# **Drug Supply Management at First-level Public Health Facilities: Case of Pyay District, Myanmar**

Thein Hlaing<sup>1\*</sup> and Tun Win Lat<sup>2</sup>

<sup>1</sup>Township Public Health Department, Zigon Township, Bago Region

<sup>2</sup>Township Public Health Department, Paungde Township, Bago Region

## **\*Corresponding Author:**

Thein Hlaing

Township Public Health Department, Zigon Township,

Bago Region, Myanmar

+95-9773603778

[\(theinhlaing231@gmail.com\)](mailto:theinhlaing231@gmail.com)

## Abstract

**Background:** First-level public health facilities (PHFs) serve as primary providers of essential medicines, necessitating critical attention to drug availability and quality assurance. This study aimed to examine the status of functional areas within the drug supply chain management framework and assess the overall capability maturity at first-level PHFs.

**Methods:** The cross-sectional study was conducted among 183 drug store sites from six townships of Pyay District. Only situational analysis was exercised to determine the existing situations. The overall capability maturity was determined according to the definitions of levels of the Capability Maturity Module Tool.

**Results:** The study encompassed 6 Maternal and Child Health Centers, 43 Rural Health Centers, and 134 Sub-rural Health Centers. In terms of drug supply management training, 58.47% lacked formal training, with 23.5% not undergoing performance reviews. Drug forecasting predominantly relied on a pen-paper system (91.6%) and factors like patient load (87.39%), drug consumption (85.71%), and disease prevalence (64.71%). Store site analysis revealed that 65.03% exhibited marginal capability, lacking standardized drugstores and employing unstandardized procedures. Storage practices varied, with 48.69% storing drugs conveniently and others categorizing them by drug type (32.79%) or using the first-expired-first-out system (40.98%). Approximately 42.69% reported having expired drugs. Concerning transportation costs, 37.16% incurred expenses exceeding 20,000 Kyats per time, with management staff often covering the costs. Waste management methods included burial pits (49.18%), incineration (62.84%), and sharp pits (55.19%). A majority (78.14%) used safety boxes, and 57.38% implemented a color-coded system for waste bins. The logistics management information system was entirely paper-based (100%), with key challenges attributed to insufficient training (62.84%), capacity issues (19.13%), and staffing concerns (38.25%). On average, assessments of drug quality conditions and physical damages scored 46.51% and 48.20%, respectively.

**Conclusion:** The study revealed that the overall supply chain maturity at first-level public health facilities is at a marginal capability level (36.35%). While some basic drug supply chain management procedures were in place, they were not consistently followed, and many systems remain manual. The findings underscored significant inconsistencies in the management functions of supplied drugs, with poor adherence to Standard Operating Procedure (SOP) guidelines.

**Keywords:** Drug supply management, First-level public health facilities, Capability maturity level

## Introduction

Primary healthcare and the provision of essential medicines constitute the primary functions of first-level public health facilities. Operating under the auspices of the Myanmar Ministry of Health, the National Supply Chain Management System (NSCMS) has transitioned to a "pull-based supply chain," driven by demand, as opposed to the erstwhile "push-based supply chain" characterized by central control over drug needs. Notably, NSCMS increased the public health spending share from 11.4% in 2009 to 23.9% in 2012, aiming to enhance the availability and relevance of crucial essential drugs across medical and public health sectors [1]. These strategic actions aim at bolstering the drug supply chain system in Myanmar. NSCMS extends technical assistance to three national programs (AIDS, Tuberculosis, and Malaria) and other sub-recipients. Additionally, it oversees warehouses and storage facilities at State and Regional procurement and supply management sections. The NSCMS management's responsibilities encompass training procurement and supply system management staff in medicinal forecasting, ordering, procurement, receiving, storing, distributing processes, and the logistics management information system. Health spending is allocated to State, Regional, District, and Township departments for their individual procurement and supply management. Rural Health Centers (RHC) and Sub-Rural Health Centers (Sub-RHC) retrieve key essential medicines from their respective township health departments or hospitals, with their procurement handled externally. However, they are responsible for forecasting drug needs, store and inventory management, transportation and distribution, waste management, and information system logistics management. To equip public health professionals with the necessary skills, formal training and refresher courses are provided [2].

In overseeing the management of supplied drugs at first-level public health facilities in Myanmar, the collaboration of basic public health professionals is crucial. Their understanding of correct supply chain processes at their respective levels is paramount. All facility staff utilize essential drugs to implement various components of primary health care, including accessible and affordable healthcare services, treatment of common ailments, communicable and non-communicable disease controls, basic medical care for mental health, maternal and child health, nutritional management, pre-referral treatments, local endemic disease control, and emergency management [3]. Public health facilities, including Rural Health Centers (RHC) and Sub-Rural Health Centers (Sub-RHC), play a pivotal role as providers of essential medicines, where drug availability and quality assurance are imperative. The distribution of substandard drugs can lead to unsuccessful treatments, drug resistance development, and adverse impacts on individual health [4]. Effective budgeting and procurement necessitate standardized and robust methods for forecasting drug needs at every provider site. The budgeting exercise, forecasting, and supply planning of the National Supply Chain Management System

(NSCMS) rely on evidence-based estimations from provider sites under the "pull" system. Accurate forecasting supports optimal allocation, and budget control, and prevents wastage of medicine [5,6].

Inventory management emerges as another critical factor for effective drug supply management at all levels. It requires a regular and organized approach, aligning with recommended guidelines, to ensure the proper storage of drugs and prevent issues such as stockouts and expiries [7]. This comprehensive approach ensures the sustainability and efficiency of drug supply systems, safeguarding patient outcomes and minimizing wastage. As per Tolliver and Bartram's report, numerous drug stores in Myanmar face challenges associated with age and overcrowding. These conditions impede store management staff from reaching their optimal potential to adhere to best-standard guidelines for drug store management [2]. The report underscores the pivotal role of effective and efficient medical supply maintenance in enhancing the utilization rate of outpatient departments (OPD). Jha and Mahatme et al., similarly emphasize the significance of store management tasks in balancing existing budgets and addressing drug necessities. This includes prioritizing purchases and distributions, ensuring adequate stock, preventing pilferage, and strategically reallocating nearly expired drugs [8,9]. The findings from Tolliver and Bartram's report also shed light on the absence of a defined waste management procedure for public health products and the lack of clear instructions on managing public healthcare waste at any level [2]. Addressing these issues is crucial for optimizing healthcare resources and ensuring the effective functioning of medical facilities.

According to the report by Tolliver and Bartram, numerous public health sector supply chains in Myanmar lack standardized drug stores. These stores, ideally situated in isolated, shaded, accessible, and secure locations with sturdy structures to prevent environmental damage and pest infestation, are deemed crucial for proper drug storage [2]. The absence of such infrastructure raises concerns about maintaining drug quality and the availability of safety equipment [10]. In the context of the drug supply chain's transportation, the responsibility for delivering medicines and medicinal equipment to State/Regional and Township health departments and major hospitals lies with CMSD and vendors, excluding RHC and Sub-RHC. The report highlights high stockout rates and the presence of expired drugs within many public health sector supply chains. Additionally, it identifies inadequacies in the healthcare waste management system. This underscores the importance of evaluating the drug supply management processes at first-level public health facilities, particularly how RHC and Sub-RHC maintain drug quality without dedicated drug stores. Key considerations include storage practices, transportation modes from township departments to RHC and Sub-RHC, cost resolution, responses to stockouts, and management of nearly expired and expired drugs. The assessment also extends to the accuracy of inventory management and drug forecasting procedures at RHC and Sub-RHC. Furthermore, scrutiny of the applied methods and procedures for healthcare waste management is

imperative to ensure hygiene and safety for both communities and healthcare providers. Recognizing potential challenges and obstacles in the entire public health sector supply chain process necessitates systematic investigation and analysis. Notably, there is a lack of published Myanmar studies on drug supply management at first-level public health facilities, making this research output a critical baseline. It provides essential insights for comprehensive support, prioritizing investments, and enhancing the capability maturity and performance of drug supply management at first-level public health facilities. The study aims to evaluate the obstacles and challenges in drug supply management at first-level public health facilities, with specific objectives including assessing supply chain management training, drug forecasting planning, drugstore and inventory management, transportation and delivery issues, waste management system, logistics management information system, quality control procedures, and overall capability maturity of the drug supply chain.

## **Material and Method**

### **Study design and scope**

This research employed a cross-sectional and descriptive approach to examine the drug supply chain at first-level health facilities (RHC and Sub-RHC) at a specific point in time. The investigation focused solely on the first-level public health drug supply chain, excluding any assessment of the supply chain levels of the township public health department, township hospital, and station hospital. The study comprehensively evaluated all functional areas of the current medicinal supply chain, including CMSD, Nutrition, TB, HIV, Malaria, Epilepsy, Leprosy, and NCD, distributed by the township public health department. Notably, it did not assess the vaccine-related supply chain and other supplies provided by the community and local donors.

### **Study settings and population**

The study targeted all 43 Rural Health Centers (RHCs), 6 Maternal and Child Health Centers (MCHs), and 134 Sub-Rural Health Centers (Sub-RHCs), totalling 183 public health facilities within Pyay District, Bago Region. Face-to-face interviews were conducted with the health personnel (a total of 183) from each RHC and Sub-RHC. Pyay District was chosen as the study area due to the active functionality of all public health facilities, the accelerated utilization of supplied drugs in outpatient department (OPD) clinics, non-communicable disease (NCD) clinics, and special clinics for retired persons, and the availability of representative and required data in this district.

### **Data collection techniques and sources of information**

Primary data were gathered through face-to-face interviews, self-administration, and observations. Background characteristics of public health facilities and drug supply management staff, training information, self-perceived capacity for drug forecasting and planning, infrastructures and safety equipment in the drugstore, and conditions of stockouts of supplied drugs were collected through self-administration. Observations covered the conditions of the place where the supplied drugs are stored and all relevant documents of drug supply management. Face-to-face interviews were conducted to obtain information on various functional areas of the drug supply chain, including forecasting drug requirements, storage procedures, ordering, receiving and dispensing the supplied drugs, transportation and delivery issues, waste management, challenges in the logistics management information system, and quality control procedures.

## **Preparation of data collection tools**

The semi-structured interview questionnaire was developed based on various sources, including training materials and checklists from WHO/CHD and BASICS [11], the capability maturity model tool by Tolliver and Bartram (2014) [2], the USAID Global Health Supply Chain Program's capability maturity module questionnaire (2019) [12], drug store guidelines from MOH Myanmar (2016) [13], and checklists from Basic Support for Institutionalizing Child Survival [11]. The questionnaire included open-ended questions, multiple-choice questions, and "Yes or No" questions, covering background information, training, drug forecasting planning, drug store and inventory management, transportation and delivery issues, waste management, logistics supply management information system, and quality control procedures. Various checklists, such as those for physical conditions of the drug store, drug storage procedures, bin cards, drug requisition forms and ordering drug supplies, receiving drug supplies, and dispensing procedures, were applied for structuring the research questionnaire. The questionnaire underwent testing for face and content validity, computation of Cronbach alpha values, and subsequent revisions to ensure reliability.

## **Assessment of capability maturity of drug supply chain**

This study aimed to evaluate the capability maturity of the drug supply chain at first-level health facilities, utilizing a modified capability maturity model (CMM) proposed by Tolliver and Bartram [2]. The CMM, adapted for measuring five maturity levels—minimal, marginal, qualified, advanced practice, and best practice—was applied to assess various functional areas within the drug supply chain.

### **(A) The Capability maturity level of capacity-building for drug supply management:**

- Level-1 (Minimal Capability): Capacity-building primarily relied on on-the-job training, learning from experiences, and informal training (Continuous Medical Education (CME)), lacking practical training guidelines.
- Level-2 (Marginal Capability): Formal training and on-the-job learning were present, but practical application of training guidelines and instructions was inconsistent.
- Level-3 (Qualified Capability): Capacity-building included formal training, refresher training, and online learning with practical application of guidelines, but lacked consistent close guidance and supportive supervision.
- Level-4 (Advanced Practice Capability): Capacity-building encompassed formal training, refresher training, and online learning with correct and consistent application of guidelines, albeit with irregular close guidance and supervision.
- Level-5 (Best Practice Capability): Capacity-building, including formal training and the use of LMIS-integrated software tools, was consistently applied with regular close guidance and supportive supervision.

### **(B) The Capability maturity level of drug forecasting planning:**

- Level-1 (Minimal Capability): Drug forecasting planning was irregular and lacked SOPs, relying on convenient procedures.
- Level-2 (Marginal Capability): SOPs and skilled staff were present, but planning remained irregular and relied on convenient procedures.
- Level-3 (Qualified Capability): SOPs and skilled staff were utilized for regular drug forecasting planning based on various factors such as service data, demographic data, drug consumption/issues data, disease prevalence, previous forecasting data, and budget.
- Level-4 (Advanced Practice Capability): SOPs and skilled staff guided regular drug forecasting planning based on comprehensive factors.
- Level-5 (Best Practice Capability): SOPs and skilled staff integrated with LMIS for advanced and efficient drug forecasting planning.

### **(C) The Capability maturity level of the drugstore:**

- Level-1 (Minimal Capability): The drugstore existed but lacked standardization, adequate size, and SOPs/guidelines.

- Level-2 (Marginal Capability): The drugstore had SOPs/guidelines, but supplied drugs were stored without consistent adherence to SOPs/guidelines.
- Level-3 (Qualified Capability): A standardized drugstore with SOPs/guidelines was present, but some drugs were not stored following standardized procedures.
- Level-4 (Advanced Practice Capability): A standardized drugstore with SOPs/guidelines and electricity was maintained, ensuring all supplied drugs were stored with standardized procedures.
- Level-5 (Best Practice Capability): A standardized drugstore with SOPs/guidelines, electricity, and engines or solar systems was in place, guaranteeing all supplied drugs were stored with standardized procedures.

#### **(D) The Capability maturity level of inventory management:**

- Level-1 (Minimal Capability): Utilizing a pull system but lacking SOPs, receiving and dispensing supplied drugs without standardized procedures.
- Level-2 (Marginal Capability): Implementing a pull system and SOPs, receiving and dispensing supplied drugs with standardized procedures.
- Level-3 (Qualified Capability): Utilizing a pull system, SOPs, and an owned-computer system for receiving, dispensing, and inventory management.
- Level-4 (Advanced Practice Capability): Utilizing a pull system, SOPs, and a government-owned computer system for receiving, dispensing, and inventory management.
- Level-5 (Best Practice Capability): Employing a pull system, SOPs, and a government-owned computer system linked with upper levels using network software for advanced inventory tracking and management.

#### **(E) The Capability maturity level of transportation and delivery:**

- Level-1 (Minimal Capability): Availability of local transportation infrastructures, but lacking SOPs/guidelines and budget for transportation costs, with health facility leaders/management staff covering expenses.
- Level-2 (Marginal Capability): Local transportation infrastructures and SOPs/guidelines were present, but township/health facility funds were used for transportation costs.
- Level-3 (Qualified Capability): Local transportation infrastructures, SOPs/guidelines, and government budget support for transportation costs were available.
- Level-4 (Advanced Practice Capability): Local transportation infrastructures, SOPs/guidelines, government budget support for transportation costs, and government-owned vehicles were present.



- Level-5 (Best Practice Capability): Availability of private sector supply mechanisms delivering supplied drugs directly to health facility drugstores.

**(F) The Capability maturity level of waste management:**

- Level-1 (Minimal Capability): Informal waste management practices by health staff with no defined waste handler.
- Level-2 (Marginal Capability): SOPs/guidelines and a designated waste handler were present, but the waste handler lacked training.
- Level-3 (Qualified Capability): SOPs/guidelines, a trained waste handler, and government budget support for waste management infrastructure were available.
- Level-4 (Advanced Practice Capability): SOPs, a trained waste handler, government budget support, and functional waste management infrastructures were in place.
- Level-5 (Best Practice Capability): Availability of private sector waste management services directly to the health facility.

To determine the capability maturity of each functional area, the researcher rated the areas on a scale of 1-20%, 21-40%, 41-60%, 61-80%, and 81-100% upon completion of each maturity level.

**Table 1. Interpretations of Supply Chain Maturity Levels of CMM Tool**

| Sr. No. | Resulted in Maturity Score | Maturity Level          | Interpretation                                                                                                                      |
|---------|----------------------------|-------------------------|-------------------------------------------------------------------------------------------------------------------------------------|
| 1       | 0% - 20%                   | Minimal Level           | Drug supply chain management is informally processed without following many guidelines, instructions, and systems.                  |
| 2       | 21% - 40%                  | Marginal Level          | Basic procedures of drug supply chain management are formally processed, but not consistent and systems are mostly manual.          |
| 3       | 41% - 60%                  | Qualified Level         | The processes of drug supply chain management are well-defined and documented and some supply chain technology is applied.          |
| 4       | 61% - 80%                  | Advanced Practice Level | The processes of drug supply chain management are well-defined and documented and supply chain technology is internally integrated. |

|   |            |                     |                                                                                                                                                |
|---|------------|---------------------|------------------------------------------------------------------------------------------------------------------------------------------------|
| 5 | 81% - 100% | Best Practice Level | The formal processes of drug supply chain management are continuously exercised and improved, and supply chain technology is fully integrated. |
|---|------------|---------------------|------------------------------------------------------------------------------------------------------------------------------------------------|

## Training of data collectors

A proficient data collection team, consisting of ten members comprising retired public health supervisors, midwives, and lady health visitors with fundamental medical knowledge, was assembled. Among them, two conducted face-to-face interviews, two served as observers, and another guided participants for self-reporting. The entire team underwent comprehensive training on all data collection instruments and a concise training guide. A pilot study was conducted in selected RHC and Sub-RHC within Nattalin Township, Bago Region, to assess the feasibility of data collection instruments, evaluate the data collectors' comprehension of methods and procedures, and estimate the time required for data collection.

## Data collection

Prior to data collection, the research objectives and contents were communicated to all regional, district, and township public health authorities, with the researcher advocating for stakeholder participation within Pyay District. The data collection plan aligned with the numbers and locations of primary public health facilities in the chosen township, with five to six rural health facilities visited each day. The entire data collection process spanned approximately 40 working days, strictly adhering to the current Covid-19 prevention guidelines issued by both central and local health authorities. Supervisors (principal researcher and co-researcher) played a crucial role in maintaining a positive relationship between data collectors and participants, addressing unexpected challenges, ensuring adherence to field data collection protocols, and overseeing the secure storage of research questionnaires and checklists. Supervision was conducted on a daily basis, encompassing in-person and tele-supervision.

## Data management and analysis

The collected data underwent coding and entry into an SPSS program spreadsheet. SPSS software was then employed for data cleaning, correction, and transformation into the desired format for subsequent analysis. This study employed situational analysis to identify obstacles and challenges in the implementation of the drug supply chain at first-level health facilities. Frequencies and proportions were computed to list and rank different types of obstacles and challenges in each functional area of

drug supply management. Strengths, weaknesses, and risk factors for functional development were determined by setting 50th percentiles based on the average scores of each functional area. Additionally, the overall maturity of the first-level health facility supply chain was computed using the average score of each functional area, classified into five levels (1-20%, 21-40%, 41-60%, 61-80%, and 81-100%), and interpreted according to the definitions of the five levels of the CMM tool.

## **Ethical consideration**

The research demonstrated a steadfast commitment to ethical standards throughout its execution. Ethical approval from the Institutional Review Board (Nay Pyi Taw), Ministry of Health, Myanmar, underscored the acceptability and viability of the research's objectives, designs, materials, and procedures. Emphasis was placed on voluntary participation, granting study participants the freedom to engage without coercion or pressure, and providing the option to withdraw at any point without needing to provide a reason. Informed consent was meticulously obtained through a comprehensive form, encompassing study objectives, importance, funding sources, duration, supervisors' contact information, and dissemination plan, with translation into Myanmar and verbal explanations when necessary. The preservation of anonymity was ensured by refraining from collecting personally identifiable information. Confidentiality was rigorously maintained by adhering to the institution's data privacy protocol, securely storing all data for five years, and restricting access to authorized personnel. The study results were presented in a representative manner, void of personalized information. Precautions were taken to prevent potential harm, including the careful structuring of the questionnaire and the establishment of comfortable data collection conditions. Results were communicated with honesty, devoid of exaggeration or manipulation, and post-data collection, participants' experiences informed the clarification of correct drug supply management processes. The study received approval from the Institutional Review Board under IRB number 2023-06, approval number IRB/2023/-03, granted on 20.3.2023

## **Results**

### **Background characteristics of public health facilities and drug supply management staff**

The survey and interviews encompassed 183 first-level public health facilities and an equivalent number of drug supply management staff. Among these, 6 (3.28%) were Maternal and Child Healthcare Centers (MCH), 43 (23.49%) were Rural Health Centers (RHC), and 134 (73.22%) were Sub-rural Health Centers (Sub-RHC). The majority (85.79%) possessed a main health facility building,

but 56.05% of them required repairs. Notably, 35.03% were over 10 years old, with 50.32% repurposed as staff houses. Among the drug supply management staff, 91.80% were female, with graduates (82.51%) and midwives (MW) (82.51%) representing the predominant educational and professional backgrounds. Concerning public sector service length, 45.36% had less than or equal to 10 years, while 54.64% exceeded 10 years. The comprehensive background characteristics of the study sample are outlined in Table 1.

**Table 1. Background characteristics of public health facilities and drug supply management staff**

| Background characteristics of public health facilities (n = 183)                |           |            | Background characteristics of drug supply management staff (n = 183) |           |            |
|---------------------------------------------------------------------------------|-----------|------------|----------------------------------------------------------------------|-----------|------------|
| Characteristics                                                                 | Frequency | Percentage | Characteristics                                                      | Frequency | Percentage |
| <b>Township (n = 183)</b>                                                       |           |            | <b>Township (n = 183)</b>                                            |           |            |
| Pyay                                                                            | 28        | 15.30      | Pyay                                                                 | 28        | 15.30      |
| Paukkaung                                                                       | 40        | 21.86      | Paukkaung                                                            | 40        | 21.86      |
| Pandaung                                                                        | 27        | 14.75      | Pandaung                                                             | 27        | 14.75      |
| Paungde                                                                         | 30        | 16.39      | Paungde                                                              | 30        | 16.39      |
| Shwedaung                                                                       | 28        | 15.30      | Shwedaung                                                            | 28        | 15.30      |
| Thaegon                                                                         | 30        | 16.39      | Thaegon                                                              | 30        | 16.39      |
| <b>Type of Public Health Facility (n = 183)</b>                                 |           |            | <b>Age of respondent (Complete years) (n = 183)</b>                  |           |            |
| RHC + MCH                                                                       | 49        | 26.78      | <= 40 Years                                                          | 112       | 61.20      |
| Sub-RHC                                                                         | 134       | 73.22      | > 40 Years                                                           | 71        | 38.80      |
| <b>Main Building of Public Health Facility (n = 183)</b>                        |           |            | <b>Gender (n = 183)</b>                                              |           |            |
| Present                                                                         | 157       | 85.79      | Male                                                                 | 15        | 8.20       |
| Absent                                                                          | 26        | 14.21      | Female                                                               | 168       | 91.80      |
| <b>Current condition of the Public Health Facility (n = 157)</b>                |           |            | <b>Highest education (n = 183)</b>                                   |           |            |
| No need to repair                                                               | 69        | 43.95      | High school passed                                                   | 25        | 13.66      |
| Need to repair                                                                  | 88        | 56.05      | Diploma                                                              | 7         | 3.83       |
| <b>Duration of the current building of the Public Health Facility (n = 157)</b> |           |            | <b>Graduate</b>                                                      |           |            |
| <= 10 Years                                                                     | 102       | 64.97      | Graduate                                                             | 151       | 82.51      |
| > 10 Years                                                                      | 55        | 35.03      | <b>Current title (n = 183)</b>                                       |           |            |
| <b>Ownership of the Public Health Facility (n = 157)</b>                        |           |            | PHS-1                                                                |           |            |
| Government                                                                      | 138       | 87.90      | PHS-1                                                                | 1         | 0.55       |
| Public                                                                          | 19        | 12.10      | PHS-2                                                                | 4         | 2.19       |
| <b>Use of Public Health Facility as Staff House (n = 157)</b>                   |           |            | MW                                                                   |           |            |
| Yes                                                                             | 79        | 50.32      | MW                                                                   | 151       | 82.51      |
| No                                                                              | 78        | 49.68      | LHV                                                                  | 13        | 7.10       |
| <b>Availability of Staff House (n = 183)</b>                                    |           |            | HA                                                                   |           |            |
| Present                                                                         | 56        | 30.60      | HA                                                                   | 14        | 7.65       |
| Absent                                                                          | 127       | 69.40      | <b>Length of service in the public health sector (n = 183)</b>       |           |            |
|                                                                                 |           |            | <= 10 Years                                                          |           |            |
|                                                                                 |           |            | <= 10 Years                                                          |           |            |
|                                                                                 |           |            | > 10 Years                                                           |           |            |
|                                                                                 |           |            | > 10 Years                                                           |           |            |
|                                                                                 |           |            | <b>Length of service at current health facility (n=183)</b>          |           |            |
|                                                                                 |           |            | <= 5 Years                                                           |           |            |
|                                                                                 |           |            | <= 5 Years                                                           |           |            |
|                                                                                 |           |            | > 5 Years                                                            |           |            |
|                                                                                 |           |            | > 5 Years                                                            |           |            |

## Drug supply management training

Regarding training in drug supply management, a notable 41.53% reported having no training, while 33.88% had undergone one course, and 7.65% received multiple courses. Among those trained, 34.21% underwent training before 2017, with 75% benefiting from refresher training and 64.47% from typical training. The breakdown of subject areas covered by training courses is detailed in Table 2.

Assessing self-perceived comprehension of the latest training, 36.84% understood 1/4, 28.95% understood 1/2, 25.00% grasped about 2/3, and 9.21% comprehended more than 3/4 of the course. Notably, 42.08% lacked training guidelines, and among those with guidelines, 48.11% understood 1/4, 13.21% understood 1/2, 29.25% comprehended about 2/3, and 9.43% understood more than 3/4. Performance evaluations of drug management staff occurred quarterly or more often (30.05%), bi-annually (32.24%), annually (11.48%), less frequently than annually (2.73%), and 23.5% were never reviewed. In the last year, 17.49% received supportive supervision, with 84.38% obtaining feedback and corrective actions. Further details on drug supply management training are available in Table 2.

| <b>Table 2. Drug supply management training (n = 183)</b>                                          |                  |                   |
|----------------------------------------------------------------------------------------------------|------------------|-------------------|
| <b>Descriptions</b>                                                                                | <b>Frequency</b> | <b>Percentage</b> |
| <b>Have you received formal drug supply management training? (n = 183)</b>                         |                  |                   |
| Yes                                                                                                | 76               | 41.53             |
| No                                                                                                 | 107              | 58.47             |
| <b>Number of formal drug supply management training received during current position (n = 183)</b> |                  |                   |
| 0 time                                                                                             | 107              | 58.47             |
| 1 time                                                                                             | 62               | 33.88             |
| > 1 time                                                                                           | 14               | 7.65              |
| <b>Last training (n = 76)</b>                                                                      |                  |                   |
| Before 2017                                                                                        | 26               | 34.21             |
| After 2017                                                                                         | 50               | 65.79             |
| <b>Types of formal drug supply management training* (n = 76)</b>                                   |                  |                   |
| Refresher training                                                                                 | 57               | 75.00             |
| Typical training                                                                                   | 49               | 64.47             |
| <b>Types of informal drug supply management training* (n = 107)</b>                                |                  |                   |
| On-the-job-training                                                                                | 17               | 15.89             |
| Continuous medical education                                                                       | 86               | 80.37             |
| Training guides and materials                                                                      | 11               | 10.28             |
| Standard operation procedures                                                                      | 5                | 4.67              |
| Self-learning                                                                                      | 53               | 49.53             |
| <b>Subjects of last drug supply management training* (n = 76)</b>                                  |                  |                   |
| Drug forecasting                                                                                   | 51               | 67.11             |
| Drug requisition form and ordering drug supplies                                                   | 48               | 63.16             |
| Drug storage procedures                                                                            | 43               | 56.58             |
| Receiving drug supplies                                                                            | 38               | 50.00             |
| Bin cards                                                                                          | 33               | 43.43             |
| Medicine Quality Assurance                                                                         | 32               | 42.11             |
| Treatment guidelines                                                                               | 32               | 42.11             |
| Physical conditions of drug store                                                                  | 29               | 38.16             |
| Waste management system of drug supply chain                                                       | 29               | 38.16             |
| Dispensing procedures                                                                              | 27               | 35.53             |
| LIMS (Logistic Information Management System)                                                      | 19               | 25.00             |
| Application of fire extinguishers                                                                  | 13               | 17.11             |
| <b>Self-perceived understandability of your last drug supply management training* (n = 76)</b>     |                  |                   |
| 25%                                                                                                | 28               | 36.84             |
| 26-50%                                                                                             | 22               | 28.95             |
| 51-75%                                                                                             | 19               | 25.00             |
| 76-100%                                                                                            | 7                | 9.21              |

|                                                                                                    |     |       |
|----------------------------------------------------------------------------------------------------|-----|-------|
| Do you have the drug supply management guidelines? (n = 183)                                       |     |       |
| Yes                                                                                                | 106 | 57.92 |
| No                                                                                                 | 77  | 42.08 |
| Self-perceived understandability of the drug supply management guidelines (n = 106)                |     |       |
| 25%                                                                                                | 51  | 48.11 |
| 26-50%                                                                                             | 14  | 13.21 |
| 51-75%                                                                                             | 31  | 29.25 |
| 76-100%                                                                                            | 10  | 9.43  |
| How often is the performance of supply management staff reviewed? (n = 183)                        |     |       |
| Quarterly or more often                                                                            | 55  | 30.05 |
| Bi-annually                                                                                        | 59  | 32.24 |
| Annually                                                                                           | 21  | 11.48 |
| Less frequently than annually                                                                      | 5   | 2.73  |
| Never                                                                                              | 43  | 23.50 |
| Has the supply management staff received supportive supervision within the last year? (n = 183)    |     |       |
| Yes                                                                                                | 32  | 17.49 |
| No                                                                                                 | 151 | 82.51 |
| Do supply chain staff receive feedback after supportive supervision? (n = 32)                      |     |       |
| Yes                                                                                                | 27  | 84.38 |
| No                                                                                                 | 5   | 15.63 |
| Are corrective actions of the supply management staff taken following supervision visits? (n = 32) |     |       |
| Yes                                                                                                | 27  | 84.38 |
| No                                                                                                 | 5   | 15.63 |
| Are guidelines/checklists for supply chain supervision available? (n = 32)                         |     |       |
| Yes                                                                                                | 25  | 78.13 |
| No                                                                                                 | 7   | 21.88 |

\* Multiple responses

## Strengths, weakness and risks (SWR) analysis of capacity building

In the SWR analysis aimed at assessing the strengths, weaknesses, and risks in the current capacity-building scenario, this study focused on various training variables, including years, frequency, status, types, subjects, and the presence of training guidelines. Each participant received a score out of 21, categorizing those scoring 10.5 (50%) and above (17, 0.29%) as having good capacity building, while the majority (166, 90.71%) scoring below 10.5 (50%) were deemed to have poor capacity building. Notably, 17.49% and 73.77% enhanced their capacities through supportive supervision and performance reviews, respectively. The self-perceived understandability of drug supply management procedures was identified as a risk, with 161 participants (87.98%) falling into the risk group due to self-perceived understandability below 50%. In the SWR analysis, guidelines and performance reviews emerged as strengths, while training and supportive supervision were identified as weaknesses, and self-perceived understandability was pinpointed as a risk.

## Forecasting the drug requirements

Concerning the forecasting of drug requirements in first-level health facilities, among the total of 183 facilities surveyed, 34.97% did not engage in forecasting drug requirements in the past year. Additionally, more than three-fifths (63.39%) lacked Standard Operating Procedures (SOPs) for this purpose, and approximately half (47.54%) reported a self-perceived capacity of 25% in drug forecasting. Among those involved in drug forecasting practices, the majority based their forecasts on service data (patient load) (87.39%), drug consumption/issue data (85.71%), population data (66.39%), disease prevalence (64.71%), and previous forecasting data (33.61%). However, 26.89% admitted to convenient forecasting practices. Regarding monitoring drug consumption, over half (54.1%) could do so regularly, while about one-third (31.69%) could monitor at times, and the remaining participants (14.2%) did not monitor at all in the previous year. Concerning report submissions, a significant majority (91.26%) submitted their Logistics Management Information System (LMIS) to upper levels, with 73.65% doing so monthly, 14.49% half-yearly, and only 2.99% bi-monthly. Additional details on drug forecasting can be found in Table 3.

**Table 3. Forecasting the drug requirements**

| <b>Descriptions</b>                                                        | <b>Frequency</b> | <b>Percentage</b> |
|----------------------------------------------------------------------------|------------------|-------------------|
| <b>Do you forecast the drug requirements? (n = 183)</b>                    |                  |                   |
| Yes                                                                        | 119              | 65.03             |
| No                                                                         | 64               | 34.97             |
| <b>SOPs for drug forecasting the drug requirements (n = 183)</b>           |                  |                   |
| Yes                                                                        | 67               | 36.61             |
| No                                                                         | 116              | 63.39             |
| <b>Self-perceived capacity for drug forecasting and planning (n = 183)</b> |                  |                   |
| 25%                                                                        | 87               | 47.54             |
| 26-50%                                                                     | 35               | 19.13             |
| 51-75%                                                                     | 51               | 27.87             |
| 76-100%                                                                    | 10               | 5.46              |
| <b>Forecasting the drug requirements based on* (n = 119)</b>               |                  |                   |
| Service data (Patient load)                                                | 104              | 87.39             |
| Drug consumption/issues data                                               | 102              | 85.71             |
| Demographic data (Population)                                              | 79               | 66.39             |
| Disease prevalence                                                         | 77               | 64.71             |
| Previous forecasting planning data                                         | 40               | 33.61             |
| Convenient procedure                                                       | 32               | 26.89             |
| Budget                                                                     | 7                | 5.88              |
| <b>Develop drug forecasting (n = 119)</b>                                  |                  |                   |
| Every two months                                                           | 16               | 13.45             |
| Quarterly                                                                  | 28               | 23.53             |
| Half-yearly                                                                | 4                | 3.36              |
| Annually                                                                   | 7                | 5.88              |
| Convenient procedure                                                       | 64               | 53.78             |
| <b>Practice for forecasting the drug requirements is to use (n = 119)</b>  |                  |                   |
| Software tool integrated with LMIS                                         | 10               | 8.40              |
| Pen and paper                                                              | 109              | 91.60             |
| <b>Do you monitor drug consumption? (n = 183)</b>                          |                  |                   |
| Yes (Regular)                                                              | 99               | 54.10             |
| Yes (Sometime)                                                             | 58               | 31.69             |

|                                                       |     |       |
|-------------------------------------------------------|-----|-------|
| No                                                    | 26  | 14.21 |
| Do you submit LMIS reports to upper levels? (n = 183) |     |       |
| Yes                                                   | 167 | 91.26 |
| No                                                    | 16  | 8.74  |
| Submission of LMIS reports (n = 167)                  |     |       |
| Monthly                                               | 123 | 73.65 |
| Bi-monthly                                            | 5   | 2.99  |
| Quarterly                                             | 7   | 4.19  |
| Half-yearly                                           | 25  | 14.97 |
| Yearly                                                | 7   | 4.19  |
| LMIS reporting frequency last year (n = 167)          |     |       |
| <= 4 times                                            | 38  | 22.75 |
| > 4 times                                             | 129 | 77.25 |

\* Multiple responses

## SWR analysis of drug forecasting

The analysis focused on variables such as SOPs, basis, patterns, practices, LMIS report submission status, and drug consumption monitoring to assess the satisfaction levels of functions. Each participant or facility received a score of 9 based on the drug requirement forecasting checklist, with 4.5 scores (50%) serving as the cutoff to categorize functions as satisfied (50% and more) or unsatisfied (less than 50%). The research identified that the overall functions of SOPs availability, drug forecasting patterns, and software availability were unsatisfactory, while the basis of drug requirement forecasting, drug consumption monitoring, and LMIS reporting status were deemed satisfactory. In terms of frequency and proportion, 73 participants (39.89%) had unsatisfactory functions, while the remaining 110 (60.11%) exhibited satisfactory functions in drug requirement forecasting. The main variable considered, the system of forecasting practice, was identified as a risk factor for functional development. In this regard, 91.6% of those practicing a pen-paper-based system for forecasting drug requirements were deemed risky for system development. Thus, in this functional area, the basis of drug requirement forecasting, monitoring drug consumption, and LMIS reporting status were strengths, SOPs availability, drug forecasting patterns, and software availability were weaknesses, and the pen-paper-based system was recognized as a risk.

## Drug store or site where the supplied drugs are stored

When examining the functional aspects of drug storage sites in 183 health facilities, it was observed that 85 (46.45%) had no designated drug store. Additionally, 156 (85.25%) lacked a standardized drug store and SOPs, while 36 (19.67%) resorted to stacking supplied drugs on the floor. Furthermore, the drug stores or sites 119 (65.03%) were deemed too small to accommodate all supplied drugs through



standard procedures. Notably, 157 (85.79%) did not employ a system of two locks with separate keys on drugstore doors, and 95 (51.91%) were unable to keep the door locked at all times when not in use. The structural conditions revealed issues such as cracks (31.15%), holds (34.97%), signs of water damage (13.11%), signs of pest infestation (35.52%), dusted shelves (57.92%), and swept floors (8.20%). Additionally, the structures lacked ceilings (40.44%), fans (98.36%), screens (99.45%), windows with white (96.17%), curtains (85.79%), secured windows (38.25%), windows with grills (75.41%), clean walls (35.52%), good ventilation (33.33%), and proper lighting (27.87%). Approximately 74.32% of drug stores or sites exhibited a neat storage system, with 68.85% employing shelves and raising drugs off the walls and floor. In terms of infrastructure, out of 183 drug stores or sites, 114 (62.29%) lacked electricity or a solar system, 171 (93.44%) had no thermometer displaying store site temperature and first-aid boxes, 104 (56.83%) lacked shelves, 71 (38.80%) lacked cabinets, 165 (90.16%) lacked fire extinguishers, 121 (66.12%) lacked safety boosts, and 175 (95.63%) lacked records of all people entering and exiting the drugstore. Further details are provided in Table 4.

**Table 4 Drug store or site where the supplied drugs are stored**

| <b>Descriptions</b>                                                                              | <b>Frequency</b> | <b>Percentage</b> |
|--------------------------------------------------------------------------------------------------|------------------|-------------------|
| Presence of a drugstore at the health facility (n = 183)                                         | 98               | 53.55             |
| Presence of a standardized drugstore at the health facility (n = 183)                            | 27               | 14.75             |
| Presence of SOPs/guidelines for drugstores (n = 183)                                             | 27               | 14.75             |
| The supplied drugs are stored in                                                                 |                  |                   |
| Separate drugstore (n = 183)                                                                     | 98               | 53.55             |
| Cabinet only (n = 183)                                                                           | 49               | 26.78             |
| Piling on the floor (n = 183)                                                                    | 36               | 19.67             |
| Presence of drugstore large enough to keep all supplied drugs (n = 183)                          | 64               | 34.97             |
| Presence of using a system of 2 locks with separate keys on the doors to the drugstore (n = 183) | 26               | 14.21             |
| Presence of keeping the door locked at all times when not in use (n = 183)                       | 88               | 48.09             |
| Absence of cracks in the drugstore or store site (n = 183)                                       | 126              | 68.85             |
| Absence of holes in the drugstore or store site (n = 183)                                        | 119              | 65.03             |
| Absence of signs of water damage in the drugstore or store site (n = 183)                        | 159              | 86.89             |
| Presence of a ceiling in the drugstore or store site (n = 183)                                   | 109              | 59.56             |
| Presence of a fan in the drugstore or store site (n = 183)                                       | 3                | 1.64              |
| Presence of a screen in the drugstore or store site (n = 183)                                    | 1                | 0.55              |
| Presence of painting windows with white (n = 183)                                                | 7                | 3.83              |
| Presence of curtains in the drugstores or store site (n = 183)                                   | 26               | 14.21             |
| Presence of secured windows (n = 183)                                                            | 113              | 61.75             |
| Presence of windows having grills (n = 183)                                                      | 45               | 24.59             |
| Absence of signs of pest infestation (n = 183)                                                   | 118              | 64.48             |
| Tidiness of drugstore or store site (n = 183)                                                    | 102              | 55.74             |
| Absence of dusted shelves (n = 183)                                                              | 77               | 42.08             |
| Absence of swept floor (n = 183)                                                                 | 168              | 91.80             |
| Presence of clean walls (n = 183)                                                                | 118              | 64.48             |
| Presence of good ventilation in the drugstore or store site (n = 183)                            | 122              | 66.67             |
| Presence of good lighting in the drugstore or store site (n = 183)                               | 132              | 72.13             |
| Presence of the following in place for the Quarantine area                                       |                  |                   |

|                                                                          |     |       |
|--------------------------------------------------------------------------|-----|-------|
| Access restricted to authorized personnel (n = 183)                      | 30  | 16.39 |
| Appropriate signage/label indicating quarantine area (n = 183)           | 4   | 2.19  |
| Segregating of different batches of quarantined drugs (n = 183)          | 5   | 2.73  |
| Storing supplied drugs neatly (n = 183)                                  | 136 | 74.32 |
| Presence of shelves and drugs raised off the walls and floor (n = 183)   | 126 | 68.85 |
| Presence of the following infrastructures in the drugstore or store site |     |       |
| Electricity (n = 183)                                                    | 69  | 37.70 |
| Thermometer (n = 183)                                                    | 12  | 6.56  |
| Shelves (n = 183)                                                        | 79  | 43.17 |
| Cabinets (n = 183)                                                       | 112 | 61.20 |
| Presence of safety equipment                                             |     |       |
| First-aid box (n = 183)                                                  | 12  | 6.56  |
| Fire extinguishers (n = 183)                                             | 18  | 9.84  |
| Masks (n = 183)                                                          | 171 | 93.44 |
| Aprons (n = 183)                                                         | 72  | 39.34 |
| Safety boosts (n = 183)                                                  | 62  | 33.88 |
| Records of all people entering and exiting the drugstore (n = 183)       | 8   | 4.37  |
| Temperature records (n = 183)                                            | 7   | 3.83  |

## SWR analysis of drug stores and store sites

This analysis assesses the satisfaction of functional areas based on drug stores, SOPs guidelines, structure maintenance, and adherence to guidelines, while infrastructures of drug stores are evaluated to determine the risk of functional development. The cut-off points were established at 50% of the average scores, designating scores below this threshold as unsatisfied functional areas or risks to functional development. The results indicate that, concerning the availability of standardized drug stores and SOPs, structure maintenance, and adherence to guidelines, the average scores of 175 drug stores or sites fell below the cut-off point, rendering their functional areas unsatisfactory. Regarding the infrastructures of drug stores, the average scores of 182 stores were beneath the cut-off point, indicating these areas are deemed risky for functional development.

## Storage procedure

In the examination of drug storage procedures, it was discovered that 151 out of 183 stores lacked SOPs/guidelines for the proper storage of supplied drugs. Among the studied stores, the storage methods varied, with some organizing drugs by category, others alphabetically or by generic names, and a significant portion following the FEFO (First Expired First Out) system. However, nearly half of the stores opted for a more convenient storage approach. Alarming, expired drugs, including Aspilet, Cotrimoxazole, injection Adrenalin, Salbutamol inhalers, Metro Syrup, and Albendazole, were found in 78 of the studied stores. The majority of stores (90.16%) had never utilized Bin Cards, and only about three-fifths conducted regular physical counts of supplied drugs. When facing stockouts, responses varied, with some reallocating from the township drugstore, others from different

health facility stores, and some relying solely on re-ordering. The study also highlighted various strategies for dealing with near-expiry and expired drugs, such as implementing the FEFO system, informing upper levels, and returning or reallocating drugs. Notably, a considerable number of drug stores lacked competent health workers for managing storage procedures, as indicated in Table 5.

| <b>Table 5 Storage procedure</b>                                                     |                  |                   |
|--------------------------------------------------------------------------------------|------------------|-------------------|
| <b>Descriptions</b>                                                                  | <b>Frequency</b> | <b>Percentage</b> |
| Presence of SOPs/guidelines for the supplied drug storage procedures (n = 183)       | 32               | 17.49             |
| The supplied drugs are shelved or grouped according to* (n = 183)                    |                  |                   |
| oral, injection, powder, creams and liquid                                           | 60               | 32.79             |
| alphabetical order/generic names                                                     | 32               | 17.49             |
| the FEFO (First Expired First Out) system                                            | 75               | 40.98             |
| supply sources                                                                       | 2                | 1.09              |
| conveniently                                                                         | 109              | 59.56             |
| Presence of expired drugs in the drugstore (n = 183)                                 | 92               | 50.27             |
| Use of Bin Cards (n = 183)                                                           | 18               | 9.84              |
| Physical counting of the supplied drugs last year (n = 183)                          |                  |                   |
| Every 3-months                                                                       | 28               | 15.30             |
| Every 6-months                                                                       | 26               | 14.21             |
| Conveniently                                                                         | 107              | 58.47             |
| Never                                                                                | 22               | 12.02             |
| The possible responses to stock out* (n = 183)                                       |                  |                   |
| Reallocation of the supplied drugs from the township drugstore                       | 67               | 36.61             |
| Reallocation of the supplied drugs from other health facility stores                 | 21               | 11.48             |
| Urgent supply of Central/Regional drugstores                                         | 2                | 1.09              |
| Refilling by Township budget                                                         | 4                | 2.19              |
| Refilling by facility budget                                                         | 8                | 4.37              |
| Substitution of the items                                                            | 28               | 15.30             |
| Only re-ordering                                                                     | 91               | 49.73             |
| The possible solutions for near-expiry and expired drugs* (n = 183)                  |                  |                   |
| Applying the FEFO system                                                             | 132              | 72.13             |
| Informing upper levels                                                               | 29               | 15.85             |
| Returning near-expiry and expired drugs to the township drugstore                    | 19               | 10.38             |
| Reallocating the near-expiry drugs to other health facilities                        | 49               | 26.78             |
| On paper using expired drugs without actual use                                      | 104              | 56.83             |
| Storing the expired drugs in a separate room                                         | 4                | 2.19              |
| Dispose of the expired drugs according to the instructions                           | 10               | 5.46              |
| More clinic activities for using near-expiry drugs                                   | 28               | 15.30             |
| Giving more medicines to one consultation time of a patient                          | 67               | 36.61             |
| Presence of a competent health worker for management of storage procedures (n = 183) | 38               | 20.77             |

\* Multiple responses

## **SWR analysis of storage procedures**

When evaluating the satisfaction levels and risks associated with storage functions, factors such as SOPs guidelines, storage procedures, physical counting, solutions for near-expiry and expired drugs, drug expiries, and the availability of competent health workers were taken into consideration. The

researchers set the cut-off point at 50% of the average scores, designating variables below this threshold as either satisfied or presenting risks. In the analysis, variables related to SOPs guidelines, storage procedures, physical counting, and solutions for near-expiry and expired drugs demonstrated average scores below the 50%-cut-off point for 173 stores and store sites, indicating dissatisfaction with these aspects for the functional development of storage procedures. Regarding the availability of competent health workers and the presence of expired drugs, proportions with competent health workers and those without expired drugs were 20.77% and 49.73%, respectively, falling below the 50%-cut-off point. Therefore, these variables were identified as posing risks for the functional development of storage procedures.

## Ordering and receiving the supplied drugs

When delving into the functional aspects of ordering and receiving supplied drugs at first-level health facilities, it was revealed that the majority (85.79%) employed a pull system. However, among the total store sites, 144 (78.69%) lacked SOPs/guidelines for ordering required drugs, 145 (79.23%) had no skilled health worker for calculating and ordering the necessary drugs, and 132 (72.13%) lacked a written request for supplied drugs. Notably, almost all drug management staff studied (96.17%) did not calculate reorder levels for each item last year and were unfamiliar with the appropriate time for reordering supplied drugs (see Table 6). Concerning the receiving process at first-level health facilities, 128 (69.95%) lacked SOPs, 75 (40.98%) checked for proper packing, 63 (34.43%) verified received quantities against requested numbers, 149 (81.42%) checked for expiry, 62 (33.88%) inspected for discolourations, 36 (19.67%) examined for broken items, 40 (21.86%) assessed for unsealed and unlabelled items, 37 (20.22%) inspected for unusual odours, and 77 (42.08%) scrutinized for damaged tablets or capsules. Of the studied facilities, 141 (77.05%) retained proofs of deliveries (POD), and within this group, 124 (87.94%) maintained PODs for more than 12 months. Discrepancies between received drug quantities and recorded numbers were experienced by 79 (43.17%) facilities, with 44 (55.70%) having documentation of these discrepancies. In recording supplied drugs, nearly all studied store sites (165, 90.16%) utilized stock ledger books. The research identified challenges in the health facility supply chain during drug receipt, including the delivery of near-expiry drugs (84.15%), late deliveries (66.67%), partial deliveries (14.21%), excess supplies (8.74%), and damaged supplies (7.65%) (refer to Table 7).

| <b>Descriptions</b>                 | <b>Frequency</b> | <b>Percentage</b> |
|-------------------------------------|------------------|-------------------|
| The drug supply system is (n = 183) |                  |                   |
| Push system                         | 1                | 0.55              |
| Pull system                         | 157              | 85.79             |
| Pull and push system                | 25               | 13.66             |

|                                                                                               |    |       |
|-----------------------------------------------------------------------------------------------|----|-------|
| Presence of SOPs/guidelines for ordering the required drugs (n = 183)                         | 39 | 21.31 |
| Use of computer for inventory management (n = 183)                                            | 1  | 0.55  |
| Presence of a skilled health worker for calculating and ordering the required drugs (n = 183) | 38 | 20.77 |
| Calculating the reorder level for each item (n = 183)                                         | 7  | 3.83  |
| Knowing the time to reorder the supplied drugs (n = 183)                                      | 7  | 3.83  |
| Presence of the written request (n = 183)                                                     | 51 | 27.87 |

## Receiving the Supplied Drugs

**Table 7. Receiving the Supplied Drugs**

| Descriptions                                                                                    | Frequency | Percentage |
|-------------------------------------------------------------------------------------------------|-----------|------------|
| Presence of SOPs/guidelines for receiving the supplied drugs (n = 183)                          | 55        | 30.05      |
| In checking the supplied drugs at all times of receiving,* (n = 183)                            |           |            |
| Checking packing                                                                                | 75        | 40.98      |
| Checking the numbers received against the numbers requested                                     | 63        | 34.43      |
| Checking expired dates                                                                          | 149       | 81.42      |
| Checking discolourations of the supplied drugs                                                  | 62        | 33.88      |
| Checking broken items                                                                           | 36        | 19.67      |
| Checking unsealed and unlabelled items                                                          | 40        | 21.86      |
| Checking unusual odour                                                                          | 37        | 20.22      |
| Checking damaged tablets or capsules                                                            | 77        | 42.08      |
| Keeping proofs of deliveries (POD) (n = 183)                                                    | 141       | 77.05      |
| If PODs are maintained, how long are they kept? (n = 141)                                       |           |            |
| Up to 3 months                                                                                  | 3         | 2.13       |
| 3-6 months                                                                                      | 5         | 3.55       |
| 6-12 months                                                                                     | 9         | 6.38       |
| More than 12 months                                                                             | 124       | 87.94      |
| Presence of discrepancies between the number of drugs received and on records (n = 183)         | 79        | 43.17      |
| Documenting the discrepancies of the supplied drugs (n = 79)                                    | 44        | 55.70      |
| What actions do you take when there is a discrepancy in the supplied drugs received? * (n = 79) |           |            |
| Inform the township/RHC                                                                         | 39        | 49.37      |
| Recording the discrepancies only                                                                | 35        | 44.30      |
| Re-order                                                                                        | 10        | 12.66      |
| In recording the supplied drugs (n = 183)                                                       |           |            |
| Stock ledger books only                                                                         | 165       | 90.16      |
| Bin Card only                                                                                   | 0         | -          |
| Both stock ledger books and Bin cards                                                           | 18        | 9.84       |
| Challenges faced by the health facility supply chain in receiving the supplied drugs* (n = 183) |           |            |
| Delivery of near-expiry drugs                                                                   | 154       | 84.15      |
| Late deliveries                                                                                 | 122       | 66.67      |
| Partial deliveries                                                                              | 126       | 68.85      |
| Excess supplies                                                                                 | 16        | 8.74       |
| Damaged supplies                                                                                | 14        | 7.65       |

\* Multiple responses

## SWR analysis of ordering and receiving the supplied drugs

In assessing the variables influencing the strengths, weaknesses, and risks within the ordering and receiving processes, the researchers scrutinized key factors such as the drug supply system, documentation practices, SOPs guidelines, checking procedures for drug items, procedural skills, and encountered challenges. The determination of these factors utilized a cut-off point set at 50% of the average scores. This investigation revealed that functions related to the pull system (85.79%), maintenance of proofs of delivery (77.05%), and documentation of drug supply-related information (77.05%) exhibited strengths, as their average scores surpassed the 50% threshold. Conversely, functions associated with SOPs guidelines, the checking process of supplied drugs, and the use of Bin cards were identified as weaknesses due to their average scores falling below 50%. Notably, the analysis pinpointed less proficiency in calculating and ordering supplied drugs (79.23%), delivery of near-expiry drugs (84.15%), late deliveries (66.67%), and partial deliveries (68.85%) as risks to functional development, given their proportions exceeding 50%.

## Dispensing the supplied drugs

When evaluating the dispensing patterns at the studied store sites, it was revealed that more than two-thirds (66.67%) lacked SOPs guidelines, and a majority implemented convenient dispensing practices. Notably, a significant portion (85.25%) maintained records of the dispensed drugs consistently. Approximately half (44.81%) of the 183 store sites adopted the First Expired First Out (FEFO) system, while over half (52.46%) employed a convenient system for storing the supplied drugs in their dispensing locations. Among the examined store sites, various methods were employed to record dispensed drugs, including sub-stock ledger books (83.06%), OPD registers (97.81%), field registers (96.17%), antenatal records (90.71%), under-five records (72.68%), and, to a lesser extent, notebooks (7.65%). Surprisingly, 54.1% dispensed drugs without labeling, presenting generic names without original packaging, and 60.11% dispensed drugs without labeling the supplied drugs, lacking original packages with expiration dates. Additionally, 45.9% of the sites implemented one or more preventive measures to counteract theft of supplied drugs in the dispensing areas (refer to Table 8).

| <b>Descriptions</b>                                                                      | <b>Frequency</b> | <b>Percentage</b> |
|------------------------------------------------------------------------------------------|------------------|-------------------|
| Presence of SOPs/guidelines for dispensing the supplied drugs (n = 183)                  | 61               | 33.33             |
| Issue pattern of the supplied drugs from the drugstore to the dispensing sites (n = 183) |                  |                   |
| Daily                                                                                    | 16               | 8.74              |
| Weekly                                                                                   | 23               | 12.57             |
| Monthly                                                                                  | 40               | 21.86             |
| Quarterly                                                                                | 4                | 2.19              |
| Bi-annually                                                                              | 3                | 1.64              |
| Conveniently                                                                             | 97               | 53.01             |

|                                                                                                                  |     |       |
|------------------------------------------------------------------------------------------------------------------|-----|-------|
| Recording the supplied drugs dispensed (n = 183)                                                                 |     |       |
| Yes (All times)                                                                                                  | 156 | 85.25 |
| Yes (Sometimes)                                                                                                  | 22  | 12.02 |
| No                                                                                                               | 5   | 2.73  |
| Storing the supplied drugs at the dispensing sites (n = 183)                                                     |     |       |
| FEFO system                                                                                                      | 82  | 44.81 |
| Alphabetically                                                                                                   | 2   | 1.09  |
| Grouping                                                                                                         | 3   | 1.64  |
| Conveniently                                                                                                     | 96  | 52.46 |
| Presence of the following records in the dispensing sites                                                        |     |       |
| Sub-stock ledger book (n = 183)                                                                                  | 152 | 83.06 |
| OPD register (n = 183)                                                                                           | 179 | 97.81 |
| Field register (n = 183)                                                                                         | 176 | 96.17 |
| Antenatal record (n = 183)                                                                                       | 166 | 90.71 |
| Under-five record (n = 183)                                                                                      | 133 | 72.68 |
| Notebook (n = 183)                                                                                               | 14  | 7.65  |
| Labelling the supplied drugs without original packages with generic names (n = 183)                              | 84  | 45.90 |
| Labelling the supplied drugs without original packages with the expired date (n = 183)                           | 73  | 39.89 |
| Preparedness of one or more preventive methods for stealing the supplied drugs in the dispensing sites (n = 183) | 99  | 54.10 |

## SWR analysis of dispensing the supplied drugs

In scrutinizing the comprehensive dispensing patterns of supplied drugs across 183 store sites, it became evident that functions related to SOP guidelines, dispensing patterns, storage practices, and the management of supplied drugs without original generic names and expiration dates scored below the 50th percentile. This indicates that these aspects represent weaknesses within the functional area. Conversely, functions associated with documentation surpassed the 50th percentile, signifying that these variables are strengths contributing to the efficiency of the functional areas.

## Transportation and delivery issues of the supplied drugs

In evaluating the transportation and delivery aspects of supplied drugs, the majority (81.97%) of the surveyed store sites lacked direct delivery through public sector supply mechanisms to their health facility drugstores. Instead, 81.97% relied on motorcycles, and 83.06% managed to transport the supplied drugs within an average travel time of less than 3 hours from the township drugstore to their health facilities. Notably, 37.16% incurred an average cost of 20,000 Kyats per trip, with expenses covered by the health facility-owned budget (25.68%), health facility leader-owned budget (42.68%), and drug supply management staff-owned budget (28.96%). A significant 68.31% perceived the payment for transportation costs as burdensome. Furthermore, 90.16% lacked SOPs, and 88.52% had no well-defined plan when transporting the supplied drugs. Additional details regarding the transportation and delivery of supplied drugs can be found in Table 9.

| <b>Table 9. Transportation and delivery issues of the supplied drugs</b>                                                    |                  |                   |
|-----------------------------------------------------------------------------------------------------------------------------|------------------|-------------------|
| <b>Descriptions</b>                                                                                                         | <b>Frequency</b> | <b>Percentage</b> |
| Availability of public sector supply mechanisms delivering the supplied directly to the health facility drugstore (n = 183) |                  |                   |
| Yes (All times)                                                                                                             | 21               | 11.48             |
| Yes (Sometimes)                                                                                                             | 12               | 6.56              |
| No                                                                                                                          | 150              | 81.97             |
| Local transportation routes for the supplied drugs used for carrying the supplied drugs*                                    |                  |                   |
| Truck (n = 183)                                                                                                             | 75               | 40.98             |
| Motorcycle (n = 183)                                                                                                        | 150              | 81.97             |
| Boat (n = 183)                                                                                                              | 11               | 6.01              |
| Hands (n = 183)                                                                                                             | 24               | 13.11             |
| Average travelling time from the township drugstore to the health facility (hour) (n = 183)                                 |                  |                   |
| ≤ 3 hours                                                                                                                   | 152              | 83.06             |
| > 3 hours                                                                                                                   | 31               | 16.94             |
| Payment for transportation cost (n = 183)                                                                                   |                  |                   |
| Government budget                                                                                                           | 3                | 1.64              |
| As the township-owned budget                                                                                                | 2                | 1.09              |
| As a health facility-owned budget                                                                                           | 47               | 25.68             |
| Cost by health facility leader-owned budget/ drug supply management staff-owned budget                                      | 131              | 71.58             |
| Average transportation cost for one time (n = 183)                                                                          |                  |                   |
| ≤ 20000 Ks                                                                                                                  | 115              | 62.84             |
| > 20000 Ks                                                                                                                  | 68               | 37.16             |
| Burden for transportation cost (n = 183)                                                                                    | 125              | 68.31             |
| Using a cost-sharing system by the patients (n = 183)                                                                       | 12               | 6.56              |
| Presence of a government-owned vehicle (n = 183)                                                                            | 16               | 8.74              |
| Applicability of the government-owned vehicle for carrying the supplied drugs (n = 16)                                      | 7                | 43.75             |
| Presence of a well-plan for carrying the supplied drugs (n = 183)                                                           | 21               | 11.48             |
| Presence of transportation SOPs (n = 183)                                                                                   | 18               | 9.84              |
| Close or direct observation method for the transportation of the supplied drugs (n = 183)                                   |                  |                   |
| Yes                                                                                                                         | 130              | 71.03             |
| No                                                                                                                          | 53               | 28.96             |
| Checking all items and their amounts together with transporters before leaving the township drugstore (n = 183)             | 162              | 88.52             |
| Check all items and their amounts together with transporters at the health facility (n = 183)                               | 149              | 81.42             |
| Experience of discrepancies after receiving the supplied drugs at a health facility (n = 183)                               | 61               | 33.33             |
| Actions for discrepancies and damages in the supplied drugs received at the health facility (n = 61)                        |                  |                   |
| Inform the township/RHC                                                                                                     | 10               | 16.39             |
| Recording the discrepancies only                                                                                            | 49               | 80.33             |
| Re-order                                                                                                                    | 2                | 3.28              |



## SWR analysis of transportation and delivery issues of the supplied drugs

The analysis revealed that the scores related to the presence of SOP guidelines, the carriage plan, and the availability of government-owned vehicles were below the 50th percentile, indicating functional weaknesses. Conversely, the scores for variables associated with closely observing drug carriage pathways and checking drug items were above the 50th percentile, signifying functional strengths. Additionally, functions related to the absence of a public sector transportation mechanism and the payment for transportation costs were identified as functional risk variables due to their average scores surpassing the 50th percentile.

## Waste management of the supplied drugs

In examining the waste management practices among 183 first-level health facilities, prevalent techniques included burial pits (49.18%), incineration (62.84%), and sharp pits (55.19%). The majority (78.14%) had ample safety boxes, and 69.40% possessed sufficient waste bins. Safely disposing of used needles was reported by 80.87%, and 57.38% implemented a color-coded system for waste bins. However, 32.24% incurred costs for waste management, with 38.98% spending more than 5000 kyats. Notably, these costs were primarily covered by health facility-owned budgets (22.95%), health facility leader-owned budgets (25.68%), and drug supply management staff-owned budgets (48.09%). Additional details regarding waste management practices are outlined in Table 10.

| <b>Descriptions</b>                                                                                    | <b>Frequency</b> | <b>Percentage</b> |
|--------------------------------------------------------------------------------------------------------|------------------|-------------------|
| Presence of SOPs/guidelines for waste management of the drug supply chain (n = 183)                    | 94               | 51.37             |
| Waste management techniques used at health facility                                                    |                  |                   |
| Burial pits (n = 183)                                                                                  | 90               | 49.18             |
| Incineration (n = 183)                                                                                 | 115              | 62.84             |
| Incineration and Burial (n = 183)                                                                      | 55               | 30.05             |
| Sharp pits (n = 183)                                                                                   | 101              | 55.19             |
| Open-pit burning (n = 183)                                                                             | 101              | 55.19             |
| Dumping (n = 183)                                                                                      | 1                | 0.55              |
| Conveniently (n = 183)                                                                                 | 18               | 9.84              |
| Having enough safety boxes (n = 183)                                                                   | 143              | 78.14             |
| Having enough waste bins (n = 183)                                                                     | 127              | 69.40             |
| Have you never recapped the used needles and disposed in the safety boxes? (n = 183)                   |                  |                   |
| Yes (All times)                                                                                        | 148              | 80.87             |
| Yes (Sometimes)                                                                                        | 27               | 14.75             |
| No                                                                                                     | 8                | 4.37              |
| Have you ever disposed of the syringes, needles and other sharp materials in the safety box? (n = 183) |                  |                   |
| Yes (All times)                                                                                        | 146              | 79.78             |

|                                                                                                                          |     |       |
|--------------------------------------------------------------------------------------------------------------------------|-----|-------|
| Yes (Sometimes)                                                                                                          | 30  | 16.39 |
| No                                                                                                                       | 7   | 3.83  |
| Using a color system of waste bin (n = 183)                                                                              | 105 | 57.38 |
| Having a trained waste handler (n = 183)                                                                                 | 13  | 7.10  |
| Having the cost for waste management (n = 183)                                                                           | 59  | 32.24 |
| Average cost for waste management (One time) (n = 59)                                                                    |     |       |
| <= 5000 Ks                                                                                                               | 36  | 61.02 |
| > 5000 Ks                                                                                                                | 23  | 38.98 |
| Availability of public sector supply waste management delivering the services to the health facility drugstore (n = 183) |     |       |
| Yes (All times)                                                                                                          | 8   | 4.37  |
| Yes (Sometimes)                                                                                                          | 13  | 7.10  |
| No                                                                                                                       | 162 | 88.52 |
| Cost for waste management (n = 183)                                                                                      |     |       |
| Government budget                                                                                                        | 5   | 2.73  |
| As the township-owned budget                                                                                             | 1   | 0.55  |
| As a health facility-owned budget                                                                                        | 42  | 22.95 |
| Cost by health facility leader-owned budget/ drug supply management staff-owned budget                                   | 135 | 73.77 |

## SWR analysis of waste management of the supplied drugs

The analysis revealed that the functional areas related to five variables (presence of SOP guidelines, waste management techniques, usage of safety boxes, usage of waste bins, and disposal procedures) attained scores surpassing the 50th percentile, signifying strengths. Conversely, the availability of public services concerning waste management received a score below the 50th percentile, denoting a weakness. Notably, the scores indicating the absence of trained waste handlers and costs associated with waste management surpassed the 50th percentile, categorizing them as potential risk factors for functional development.

## Logistics management information system (LMIS)

In the examination of the LMIS across 183 public health facilities, it was revealed that 62.84% lacked SOP guidelines for the operational definitions of LMIS, and all exclusively utilized paper-based LMIS. The performance percentages for various LMIS documentation variables, such as invoice vouchers (89.62%), stock ledger books (99.45%), OPD registers (98.91%), field registers (100%), requisition forms (74.86%), issue vouchers (73.22%), audit forms (85.79%), and health facility stock report books (91.26%), were generally good, with only two variables, Bin cards (9.84%) and discrepancy report forms (32.24%), exhibiting lower performance. Notably, the percentage of health facilities capable of completing all required cells in LMIS documents was also commendable. However, when assessing the consistency of drug balances between stock books and stores for five randomly selected drug items,

the average percentage of consistency across all drug store sites studied was a mere 13.66%. Challenges encountered in LMIS encompassed issues such as stock out of tools (87.98%), delayed feedback (13.11%), difficulties in filling (23.50%), challenges in data analysis and retrieval (20.77%), use of different versions of tools (34.43%), use of outdated tools (9.84%), insufficient training (62.84%), inadequate human resource capability (19.13%), and a shortage of staff (38.25%) (refer to Table 11 for details).

| <b>Descriptions</b>                                                                            | <b>Frequenc<br/>y</b> | <b>Percentag<br/>e</b> |
|------------------------------------------------------------------------------------------------|-----------------------|------------------------|
| Presence of guidelines/SOPs for LMIS (n = 183)                                                 | 68                    | 37.16                  |
| Types of LMIS tools (n = 183)                                                                  |                       |                        |
| Paper-based LMIS only                                                                          | 183                   | 100.00                 |
| Electronic LMIS only                                                                           | 0                     | -                      |
| Both paper-based and electronic LMIS                                                           | 0                     | -                      |
| Presence of the following documents in the health facility                                     |                       |                        |
| Invoice vouchers (n = 183)                                                                     | 164                   | 89.62                  |
| Stock ledger books (n = 183)                                                                   | 182                   | 99.45                  |
| OPD registers (n = 183)                                                                        | 181                   | 98.91                  |
| Field registers (n = 183)                                                                      | 183                   | 100.00                 |
| Bin cards (n = 183)                                                                            | 18                    | 9.84                   |
| Requisition forms (n = 183)                                                                    | 137                   | 74.86                  |
| Issue vouchers (n = 183)                                                                       | 134                   | 73.22                  |
| Discrepancy report forms (n = 183)                                                             | 59                    | 32.24                  |
| Audit forms (n = 183)                                                                          | 157                   | 85.79                  |
| Health facility stock report book (n = 183)                                                    | 167                   | 91.26                  |
| Presence of documents listing the supplied drugs that will expire within six months? (n = 183) | 57                    | 31.15                  |
| Complement of information on stock ledger book.                                                |                       |                        |
| Serial number (n = 183)                                                                        | 168                   | 91.80                  |
| Page number (from-to) (n = 183)                                                                | 160                   | 87.43                  |
| Red colour for entering the received drugs (n = 183)                                           | 176                   | 96.17                  |
| Blue colour for entering the issued drugs (n = 183)                                            | 174                   | 95.08                  |
| Complement of table of content in stock ledger book                                            |                       |                        |
| Serial number (n = 183)                                                                        | 181                   | 98.91                  |
| Product name and strength (n = 183)                                                            | 179                   | 97.81                  |
| Accounting unit (n = 183)                                                                      | 170                   | 92.90                  |
| Page number (n = 183)                                                                          | 180                   | 98.36                  |
| Complement of all (14) cells on stock ledger book                                              |                       |                        |
| 1 <sup>st</sup> randomly selected drugs (14 cells) (n = 183)                                   | 145                   | 79.23                  |
| 2 <sup>nd</sup> randomly selected drug (14 cells) (n = 183)                                    | 147                   | 80.33                  |

|                                                                                          |     |       |
|------------------------------------------------------------------------------------------|-----|-------|
| 3 <sup>rd</sup> randomly selected drug (14 cells) (n = 183)                              | 146 | 79.78 |
| 4 <sup>th</sup> randomly selected drug (14 cells) (n = 183)                              | 143 | 78.14 |
| 5 <sup>th</sup> randomly selected drug (14 cells) (n = 183)                              | 145 | 79.23 |
| Reporting health facility stock report to township every 2 months (n = 167)              | 107 | 64.07 |
| Complement of the number of cells on health facility stock report (last month) (n = 183) |     |       |
| <= 50% Complement                                                                        | 83  | 45.36 |
| > 50% Complement                                                                         | 100 | 54.64 |
| Consistency of drug balance                                                              |     |       |
| 1 <sup>st</sup> randomly selected drugs (n = 183)                                        | 26  | 14.21 |
| 2 <sup>nd</sup> randomly selected drug (n = 183)                                         | 28  | 15.30 |
| 3 <sup>rd</sup> randomly selected drug (n = 183)                                         | 22  | 12.02 |
| 4 <sup>th</sup> randomly selected drug (n = 183)                                         | 22  | 12.02 |
| 5 <sup>th</sup> randomly selected drug (n = 183)                                         | 29  | 15.85 |
| Challenges when using LMIS                                                               |     |       |
| Stock out of tools (n = 183)                                                             | 161 | 87.98 |
| Delayed feedback (n = 183)                                                               | 24  | 13.11 |
| Difficulties in filling (n = 183)                                                        | 43  | 23.50 |
| Challenges in the analysis of data (n = 183)                                             | 38  | 20.77 |
| Challenges in the retrieval of data (n = 183)                                            | 38  | 20.77 |
| Use of different versions of tools (n = 183)                                             | 63  | 34.43 |
| Use of outdated tools (n = 183)                                                          | 18  | 9.84  |
| Insufficient training (n = 183)                                                          | 115 | 62.84 |
| Insufficient human resource capability (n = 183)                                         | 35  | 19.13 |
| Insufficient number of staff (n = 183)                                                   | 70  | 38.25 |

## Quality control procedures of the supplied drugs at health facility

When evaluating the quality control procedures for supplied drugs at 183 drugstore sites, it was discovered that 71.04% lacked SOP guidelines. Approximately half of the sites conducted monthly checks on various parameters such as packing damages, brand integrity, seal and instruction conditions, changes in colors, sedimentation in injections, cracks, humidity, leaking, oil drying, crushed or broken drugs, loss of drugs from blister cards, stickiness, unusual odors, and expiration dates (refer to details in Table 12). The assessment of physical damages included checks for overlay (27.32%), dusty drugs and packing (80.33%), signs of pest infestation (74.86%), signs of water damage (66.67%), presence of waste bins (69.40%), "No Smoking" signboard (42.62%), presence and condition of fire extinguisher (24.59% and 19.67% respectively), presence of sandbags near the drug store (13.11%), preventive measures for pest infestation (27.87%), and data quality assessment (29.51%). On average, the evaluation of storage quality and physical damages of drugs scored 46.06%, falling below the 50th percentile (125 sites or 68.30%), and 48.20%, also below the 50th percentile

(96 sites or 52.46%), respectively. Notably, 52.46% of stores exhibited an average score of monthly checks for physical drug quality below 50 (see Table 12 for details).

| <b>Table 12. Quality control procedures of the supplied drugs at health facility</b>             |                  |                   |
|--------------------------------------------------------------------------------------------------|------------------|-------------------|
| <b>Descriptions</b>                                                                              | <b>Frequency</b> | <b>Percentage</b> |
| Presence of guidelines/SOPs for quality control of supplied drugs at health facilities (n = 183) | 53               | 28.96             |
| Monthly checking of the following conditions of the supplied drugs at the health facility        |                  |                   |
| Damages of packing (n = 183)                                                                     | 74               | 40.44             |
| Damages of brand, seal and instruction (n = 183)                                                 | 80               | 43.72             |
| Colour changes (n = 183)                                                                         | 84               | 45.90             |
| Presence of sedimentation (n = 183)                                                              | 78               | 42.62             |
| Presence of cracks (n = 183)                                                                     | 90               | 49.18             |
| Packing humidity (n = 183)                                                                       | 90               | 49.18             |
| Presence of leaking (n = 183)                                                                    | 91               | 49.73             |
| Drying of oil (n = 183)                                                                          | 85               | 46.45             |
| Presence of crushed/broken drugs (n = 183)                                                       | 86               | 46.99             |
| Loss of drugs from blister cards (n = 183)                                                       | 86               | 46.99             |
| Presence of sticky drugs (n = 183)                                                               | 86               | 46.99             |
| Presence of unusual odours (n = 183)                                                             | 86               | 46.99             |
| Presence of expired drugs (n = 183)                                                              | 120              | 65.57             |
| Checking physical damages of the supplied drugs                                                  |                  |                   |
| Overlay (n = 183)                                                                                | 50               | 27.32             |
| Dusty drugs and packing (n = 183)                                                                | 147              | 80.33             |
| Signs of pest infestation (n = 183)                                                              | 137              | 74.86             |
| Signs of water damage (n = 183)                                                                  | 122              | 66.67             |
| Presence of waste bins (n = 183)                                                                 | 127              | 69.40             |
| Signboard of "No Smoking" (n = 183)                                                              | 78               | 42.62             |
| Presence of fire extinguisher (n = 183)                                                          | 45               | 24.59             |
| Good condition of fire extinguisher (n = 183)                                                    | 36               | 19.67             |
| Presence of sandbags near the drugstore (n = 183)                                                | 24               | 13.11             |
| Preventive measures for pest infestations (n = 183)                                              | 51               | 27.87             |
| Regular conducting data quality assessment (DQA) (n = 183)                                       | 54               | 29.51             |

## **Capability maturity level of the functional areas of the drug supply chain at the first-level health facilities**

In assessing the capability maturity level of various functional areas within drug supply management, each area's average scores were categorized into five levels (0-20%, 21-40%, 41-60%, 61-80%, and 81-100%), based on the fulfillment of predefined criteria outlined in the method section. The outcomes of this analysis, revealing the capability maturity levels of the functional areas, are presented in Table 13. The overall supply chain maturity, derived from the collective assessment of these functional areas, is identified as being at a marginal capability level, with an average score of 36.35% (Table 13). This

indicates that there is room for improvement across the evaluated domains to enhance the overall maturity and effectiveness of the drug supply management system.

The Capability Maturity Level of various functional areas within Drug Supply Management is depicted in the provided table, offering insights into the percentage distribution across different capability levels for each area. Starting with Capacity Building, the majority of facilities (32.11%) fall under the Best category, indicating a high level of maturity, while others range from Minimal to Advanced. In Drug Forecasting, a significant portion (42.72%) achieved the Advanced level, showcasing strong capabilities in forecasting drug requirements. However, the Drug Store category demonstrates a predominant concentration in the Marginal level (32.76%), highlighting a need for improvement in storage facility management.

Storage Procedure capabilities exhibit a varied distribution, with a substantial portion (25.41%) falling in the Marginal level. Ordering Drugs and Receiving Drugs present challenges, with the majority of facilities at the Minimal level (38.67% and 43.17%, respectively). Dispensing Drugs and Transportation areas exhibit a more balanced distribution across various levels, with significant portions in the Advanced and Best categories, reflecting relatively mature practices.

Waste Management reveals a notable strength, with a considerable proportion (51.47%) falling in the best category, indicating effective waste management practices. The Drug Quality Checking area shows a balanced distribution across different levels, with a considerable portion (47.39%) at the Advanced level, suggesting a commendable quality control mechanism.

The average scores across all functional areas collectively indicate a moderate capability maturity level (36.35%) in the studied drug supply management facilities. The average score across all functional areas indicates an overall moderate capability maturity level in drug supply management for the studied facilities. Areas like ordering drugs and storage procedures appear to have lower maturity levels, while receiving drugs, dispensing drugs, waste management, and drug quality checking show relatively higher maturity levels.

Table 13. Capability maturity level of functional areas of drug supply management

| Functional Areas of Drug Supply Management | Capability Maturity Level of Functional Areas |                   |                    |                   |                | Average Scores (%) |
|--------------------------------------------|-----------------------------------------------|-------------------|--------------------|-------------------|----------------|--------------------|
|                                            | Minimal (0=20%)                               | Marginal (21-40%) | Qualified (41-60%) | Advanced (61-80%) | Best (81-100%) |                    |
| Capacity Building                          | 83                                            | 50                | 20                 | 3                 | 27             | 32.11%             |
| Drug Forecasting                           | 57                                            | 16                | 56                 | 51                | 3              | 42.72%             |
| Drug Store                                 | 31                                            | 119               | 32                 | 1                 |                | 30.03%             |
| Storage Procedure                          | 54                                            | 92                | 33                 | 4                 |                | 26.21%             |
| Ordering Drugs                             | 140                                           | 24                | 14                 | 4                 | 1              | 12.65%             |

|                                        |     |    |    |    |    |        |
|----------------------------------------|-----|----|----|----|----|--------|
| Receiving Drugs                        | 0   | 50 | 75 | 44 | 14 | 53.27% |
| Dispensing Drugs                       | 2   | 33 | 67 | 60 | 21 | 56.93% |
| Transportation                         | 164 | 14 | 5  |    |    | 10.76% |
| Waste Management                       | 5   | 39 | 74 | 62 | 3  | 51.47% |
| Drug Quality Checking                  | 56  | 36 | 15 | 50 | 26 | 47.39% |
| Average scores of all functional areas |     |    |    |    |    | 36.35% |

## Discussion

This primary research aimed to assess the capability maturity of the drug supply chain and identify the obstacles and challenges faced by first-level public health facilities in Myanmar. Prior to this study, a baseline assessment conducted in 2014 by Tolliver and Bartram provided an overview of Myanmar's national supply chain [2]. However, this assessment did not specifically address the functional aspects of the drug supply chain at first-level public health facilities. Given the critical role played by these facilities, particularly Rural Health Centers (RHC) and Sub-Rural Health Centers (Sub-RHC), in delivering low-cost essential health services, their drug supply chains are vital for providing accessible primary healthcare to approximately 70% of the country's population. With a significant rural population facing challenges in accessing higher-level healthcare services, strengthening the drug supply chain at the first-level public health facilities is crucial. This research serves as a baseline assessment to enhance the maturity of the first-level public health supply chain, identifying weaknesses and areas of risk that require attention for improved drug supply quality.

### Supply chain management training

The research findings on training information about drug supply management highlighted several key aspects of capacity building among the studied staff. The prevalence of inadequate training, with 41.53% having no training, indicated a significant gap that needs attention. A comparative analysis of existing research emphasized the importance of continuous training in pharmaceutical management for ensuring effective and safe healthcare delivery [14]. Studies such as [14,15] have underscored the positive impact of training programs on enhancing the skills and knowledge of healthcare professionals in drug supply management. The temporal distribution of training courses, with 34.21% conducted before 2017, revealed a potential need for updated training content in alignment with evolving pharmaceutical practices. Internationally recognized study, such as [16], have emphasized the importance of periodic updates in training programs to keep healthcare professionals abreast of the latest advancements in drug supply management.

The self-perceived understandability assessment provided insights into the effectiveness of the training received. The fact that a significant proportion (36.84%) understood only 1/4 of the training course suggested potential issues with the clarity and comprehensibility of the training content. Research by [17] has emphasized the need for tailored and easily understandable training materials to maximize knowledge retention and application. The absence of training guidelines for 42.08% of the participants raised concerns about the standardization and consistency of training programs. Internationally recognized guidelines, such as those proposed by the World Health Organization [18], stressed the importance of standardized training frameworks for ensuring uniformity and effectiveness across healthcare settings. The SWR analysis provided a comprehensive evaluation of capacity building in drug supply management. The identification of strengths, weaknesses, and risks offers a valuable framework for strategic interventions. Comparable study, such as [19], have utilized SWR analyses to inform capacity-building initiatives in healthcare systems, emphasizing the need for a multifaceted approach. The research findings underscored the critical need for targeted interventions in the training and capacity-building initiatives for drug supply management staff. Recommendations include the development of updated and standardized training programs, incorporating feedback from participants to enhance understandability. Collaborative efforts with international organizations can provide insights into best practices, ensuring the alignment of capacity-building efforts with global standards. Regular performance reviews and supportive supervision should be integral components of ongoing capacity-building initiatives, fostering continuous improvement in drug supply management practices.

## **Drug forecasting planning**

The research findings on drug requirement forecasting at first-level health facilities revealed several challenges and strengths within the existing system. A comparative analysis with existing research findings from international journals sheds light on global best practices and potential solutions. The significant proportion (34.97%) of facilities not practicing drug requirement forecasting highlighted a crucial gap in pharmaceutical management. Study such as [20] emphasized the importance of forecasting in ensuring a stable drug supply, reducing stockouts, and improving overall healthcare service delivery. The lack of forecasting practices may lead to inefficient resource allocation and compromise the ability to meet patient needs promptly. The absence of Standard Operating Procedures (SOPs) for drug forecasting in more than three-fifths (63.39%) of the facilities was a notable weakness. Internationally recognized guidelines, such as those recommended by the World Health Organization [18], stressed the importance of SOPs in ensuring consistency, reliability, and accuracy in forecasting. SOPs act as a cornerstone for effective pharmaceutical management, guiding staff in standardized procedures.



The self-perceived capacity of about half (47.54%) of the facilities at only 25% indicated a potential lack of confidence or training in drug forecasting practices. A comparative study, such as [21], highlighted the positive correlation between staff training and forecasting accuracy. Recommendations include targeted capacity-building programs to enhance the skills and confidence of healthcare professionals in drug forecasting. The basis for drug requirement forecasting, including patient load, drug consumption data, population data, disease prevalence, and previous forecasting data, highlighted a reliance on diverse information sources. A study by [22] underscored the importance of integrating multiple data sources for accurate forecasting, emphasizing the need for a comprehensive approach similar to the one observed in the surveyed facilities.

The SWR analysis provided a structured evaluation of the functional areas related to drug forecasting. The identification of SOPs, basis, patterns, practices, submission status of LMIS reports, and monitoring drug consumption as variables in the analysis aligned with best practices in pharmaceutical management [23]. The consideration of a cut-off point at 50% added objectivity to the evaluation process. The finding that 39.89% of participants had an unsatisfied function in drug requirement forecasting suggested critical areas for improvement. The identification of a pen-paper-based system as a risk factor echoed findings from [24], which emphasized the benefits of transitioning to electronic forecasting systems for increased accuracy and efficiency. The research underscored the need for targeted interventions in SOP development, capacity building, and system improvement for drug requirement forecasting at first-level health facilities. Recommendations include the implementation of SOPs, enhanced training programs, and the adoption of modern forecasting tools to mitigate risks associated with manual systems.

## **Drug store and inventory management**

The examination of drug stores and storage facilities at first-level health facilities has revealed a spectrum of challenges and strengths crucial for the pharmaceutical supply chain. In comparing these findings with established research from international journals, it becomes apparent that deficiencies in infrastructure, suboptimal storage practices, and maintenance issues are prevalent concerns. A substantial number of health facilities lacked essential elements such as ceilings, fans, screens, and secure windows, as highlighted by a previous study [23]. Additionally, the storage practices, including piling drugs on the floor, resonated with research emphasizing the importance of standardized storage procedures to ensure drug stability and prevent contamination [23]. Structural problems, like cracks and signs of water damage, underscored the need for regular maintenance, aligning with existing literature [23]. The absence of security measures, such as a system of two locks and maintaining locked

doors, raised concerns regarding unauthorized access, aligning with recommendations stressing stringent security protocols in pharmaceutical storage [23].

The SWR analysis further categorized the findings into unsatisfied functional areas and risks for functional development. Average scores below the 50% cut-off point indicated unsatisfactory functional areas, particularly in drug stores, SOPs adherence, structure maintenance, and guideline adherence. Research corroborated the critical role of SOP adherence in effective pharmaceutical management. Infrastructural aspects, with scores below the cut-off point, suggested potential risks for functional development, as supported by international studies correlating infrastructural deficiencies with risks to pharmaceutical storage [23].

In light of these findings, recommendations for improvement include prioritizing infrastructure enhancements, strict adherence to SOPs guidelines, regular maintenance schedules, and the implementation of robust security measures. Previous research supported these recommendations, emphasizing the positive impact of SOP adherence and proactive maintenance on pharmaceutical quality [23]. Addressing the identified challenges and implementing the recommended interventions will contribute to enhancing the functionality and reliability of drug stores and storage sites at first-level health facilities, ensuring the integrity and quality of the pharmaceutical supply chain.

In Myanmar, the Department of Public Health distributed drug store guideline manuals to first-level public health facilities in 2016 [1] and provided training to the public health supply system management staff in 2014 and 2020 [13]. However, the absence of separated drugstores was a significant challenge, leading to difficulties in inventory management. Most facilities stored drugs by piling them, lacking protection against environmental damage, pilferage, and pest infestation. While the average storage time was four months, facilities faced challenges in following storage guidelines and dealing with expired drugs. Recommendations include prioritizing public health spending for drugstore infrastructure. Concerning drug orders, facilities lacked effective adherence to the principle of maintaining a minimum of twice to a maximum of four times the monthly requirement. Staff struggled with calculating reorder factors and levels, citing discrepancies between their orders and supplies from upper levels. Additionally, drug pre-orders from lower-level facilities were not definitively provided. Challenges in the drug-receiving process included the lack of timely drug supply and acceptance of nearly expired drugs. In drug dispensing, first-level facilities exhibited a random extraction pattern, often taking drugs directly from the main drugstore. This may be due to convenience and uncertainties about the safety of drugs in isolated storage. The study suggests that upper-level authorities need to provide effective supervision and training for systematic drug orders, acceptance, and distribution. A top-down approach for better inventory management is recommended.

The study on drug storage procedures revealed that 151 out of 183 stores lacked Standard Operating Procedures (SOPs) or guidelines for proper drug storage. The storage practices varied, with some stores grouping drugs by type, alphabetical order, the FEFO system, or supply sources. Nearly half of the stores stored drugs conveniently. A concerning finding was the presence of expired drugs, including Aspilet, Cotrimoxazole, injection Adrenalin, Salbutamol inhalers, Metro Syrup, and Albendazole, in 78 stores. The majority (90.16%) never used Bin Cards, and 58.47% conducted physical counts. Responses to stockouts included reallocation from the township drugstore, other health facility stores, or reordering. The SWR analysis evaluated SOPs, storage procedures, physical counting, solutions for near-expiry and expired drugs, the presence of expired drugs, and competent health workers. Findings indicated that the average scores for 173 stores were below the 50% cut-off point, indicating dissatisfaction with the functional development of storage procedures. Additionally, the availability of competent health workers and the absence of expired drugs were considered risky for the functional development of storage procedures.

Scientifically, these findings aligned with international literature emphasizing the importance of standardized storage procedures and the need for competent health workers in pharmaceutical management [25]. Existing research [25] highlighted the risks associated with poor storage practices, including the presence of expired drugs. Recommendations include the urgent implementation of SOPs, training programs for storage management, and addressing the critical shortage of competent health workers. Future studies should explore effective strategies for improving storage procedures and mitigating risks in pharmaceutical management.

The study focused on the functional aspects of ordering and receiving supplied drugs at first-level health facilities. It revealed that the majority (85.79%) of store sites utilized a pull system, but a significant portion lacked SOPs/guidelines for drug ordering (78.69%) and skilled health workers for calculating and ordering drugs (79.23%). A notable finding was that 72.13% of store sites had no written request for supplied drugs, and 96.17% of drug management staff did not calculate reorder levels or know the time to reorder. In terms of receiving supplied drugs, challenges were identified, including the lack of SOPs (69.95%) and issues such as late deliveries (66.67%), partial deliveries (14.21%), and damaged supplies (7.65%). The study highlighted the use of stock ledger books (90.16%) for recording supplied drugs. The SWR analysis categorized functions related to the pull system, maintenance of proofs of deliveries (POD), and documentation of drug supply-related information as strengths due to average scores above 50%. Conversely, functions related to SOPs, checking processes for supplied drugs, and the use of Bin cards were deemed weaknesses with average scores below 50%. Risks for functional development were identified, including less skill in calculating

and ordering supplied drugs (79.23%), delivery of near-expiry drugs (84.15%), late deliveries (66.67%), and partial deliveries (68.85%).

This aligned with existing literature [23] emphasizing the importance of standardized procedures, documentation, and skilled personnel in drug supply management. Recommendations include urgent SOP implementation, targeted training for health workers, and addressing challenges in the ordering and receiving processes. Future research should explore effective strategies to enhance these functional areas and mitigate identified risks.

The study delved into the dispensing patterns of the store sites, revealing notable findings. A significant proportion (66.67%) operated without SOPs guidelines, and more than half adopted convenient dispensing patterns. Despite 85.25% maintaining records of dispensed drugs, around 44.81% applied the First Expired First Out (FEFO) system, and 52.46% employed a convenient system for storing supplied drugs at dispensing sites. Regarding documentation, the majority used various records, including sub-stock ledger books, OPD registers, field registers, antenatal records, and under-five records. However, 54.1% dispensed drugs without labeling them with generic names, and 60.11% did not label drugs with expiration dates. Additionally, 45.9% implemented preventive measures against drug theft in dispensing sites. The SWR analysis highlighted weaknesses in variables related to SOP guidelines, dispensing patterns, and storage methods. These aspects scored below the 50th percentile, indicating functional weaknesses. Conversely, documentation-related variables scored above the 50th percentile, suggesting strengths in the functional areas.

Existing research [20] emphasizes the critical role of SOPs in ensuring consistent and safe dispensing practices. Recommendations include the urgent implementation of SOPs, training programs for dispensing staff, and the adoption of standardized labelling practices. Future research should explore strategies to enhance dispensing patterns and improve drug security measures.

## **Transportation and delivery issues**

At present, Myanmar's Ministry of Health shoulders the significant task of procuring and disseminating medicines essential for over 10,000 public health facilities [1]. The orchestration of drug distribution becomes intriguing when contemplating the journey of these vital medicines. The Central Medical Store Depot (CMSD) takes the reins, ensuring a seamless flow as it dispatches medicines directly to the Township Public Health Department (TPHD) and upper echelons. This dynamic process eliminates the need for excessive pondering on transportation logistics for TPHD and upper levels [2].

The intricate dynamics of transportation and delivery of supplied drugs at first-level health facilities in Myanmar warrant careful consideration. An overwhelming 81.97% of store sites operated outside

public sector supply mechanisms, relying on motorcycles as the primary mode of transport, covering an average distance of less than 3 hours from the township drugstore. Notably, the financial responsibility for transportation costs was distributed among health facility-owned budgets (25.68%), health facility leader-owned budgets (42.68%), and drug supply management staff-owned budgets (28.96%), emphasizing the economic strain faced by these entities, as reported by 68.31% of respondents. A glaring procedural deficiency was highlighted, with 90.16% of cases lacking Standard Operating Procedures (SOPs) for drug transportation and delivery, indicating a critical gap in operational guidelines. The SWR analysis accentuated functional weaknesses in the absence of SOP guidelines and carriage plans, compounded by the dearth of government-owned vehicles. Counteractively, strengths were discerned in the meticulous observation of drug carriage pathways and thorough checks on drug items. However, the absence of a public sector transportation mechanism and the financial burden associated with transportation costs emerged as significant risks in this intricate supply chain. Strategic interventions were imperative to address these challenges and enhanced the efficiency and reliability of drug transportation and delivery systems at the first-level health facilities in Myanmar. Comprehensive research studies and interventions in comparable global contexts should be explored for potential insights and best practices to inform tailored improvements in Myanmar's supply chain.

## **Waste management**

The examination of waste management practices associated with supplied drugs across 183 first-level health facilities in Myanmar unveiled a nuanced scenario. Predominant techniques encompassed burial pits (49.18%), incineration (62.84%), and sharp pits (55.19%). Notably, a significant proportion maintained an adequate supply of safety boxes (78.14%) and waste bins (69.40%). Moreover, there was a commendable disposal rate for used needles, with 80.87% ensuring safe disposal, and 57.38% employing a color-coded system for waste bins. Nevertheless, challenges persisted, as 32.24% incurred costs for waste management, and nearly 39% of these spent over 5000 kyats. The financial burden was primarily shouldered by health facility-owned budgets (22.95%), health facility leader-owned budgets (25.68%), and drug supply management staff-owned budgets (48.09%).

A comprehensive SWR analysis underscored strengths in the functional areas of SOP guidelines, diverse waste management techniques, adequate provision of safety boxes, proper utilization of waste bins, and effective disposal procedures—all scoring above the 50th percentile. However, a notable weakness was evident in the availability of public services for waste management, with a score below the 50th percentile. The absence of trained waste handlers and the financial costs associated with waste management emerge as potential risk factors, given their scores above the 50th percentile.

To enhance waste management practices, Myanmar's health facilities could benefit from fortifying public services, ensuring training for waste handlers, and exploring cost-effective waste management strategies. These findings underscored the importance of tailored interventions to address specific weaknesses and risks in waste management within the first-level health facilities of Myanmar.

In gauging the overall performance across different functional areas in our study, the waste management system emerged as the standout performer, boasting the highest capability maturity level score. This notable achievement can be attributed to strategic provisions for waste management stemming from diverse programs within the first-level public health facilities. Take, for instance, the proactive measures implemented to tackle the COVID-19 pandemic, which equipped health facilities with essential infrastructures and tools for both disease prevention and the proper disposal of vaccines. However, our investigation unearthed a significant caveat – the burden of waste management fell directly on the shoulders of the drug management staff, demanding their direct involvement and financial commitment. The absence of trained waste handlers and the associated costs of waste management pose potential risks, casting shadows over the sustained effectiveness of this critical functional area.

## **Logistics management information system**

The evaluation of the Logistics Management Information System (LMIS) in 183 public health facilities reveals a mixed landscape. Alarming, a substantial 62.84% lacked Standard Operating Procedure (SOP) guidelines for the operational definitions of LMIS and exclusively relied on paper-based systems. While the performance percentages for various LMIS documentation aspects, such as invoice vouchers, stock ledger books, and health facility stock report books, exhibited robust figures, there are notable exceptions like Bin cards (9.84%) and discrepancy report forms (32.24%). The consistency of drug balance between stock books and stores remained a critical concern, with an average percentage of only 13.66%.

Challenges plaguing LMIS implementation included frequent stockouts of tools, delayed feedback, difficulties in data filling, analysis, and retrieval, usage of different tool versions, reliance on outdated tools, inadequate training (62.84%), insufficient human resource capability (19.13%), and a shortage of staff (38.25%). These findings underscored the urgent need for targeted interventions to streamline and fortify LMIS processes. Benchmarking against established international best practices, alongside tailored training programs and resource augmentation, was imperative to enhance LMIS effectiveness in the dynamic landscape of public health facilities. This warranted collaborative efforts and knowledge exchange with global initiatives addressing similar LMIS challenges, ensuring a

comprehensive and sustainable improvement. The distribution of SOP/Guidelines within the LMIS functional domain emerged as a weak link, with each department relying solely on a pen-and-paper-based system for LMIS operations. On a positive note, document maintenance and record-keeping exhibited robust practices across most departments. However, when delving into the challenges faced by LMIS, a deficiency in formal training and a scarcity of essential resources like stock, registers, and reporting forms came to the forefront, posing hurdles to the seamless functioning of the system.

## Quality control procedures

The assessment of quality control procedures for supplied drugs across 183 drugstore sites revealed notable gaps, with 71.04% lacking Standard Operating Procedure (SOP) guidelines. Approximately half of the sites conducted monthly checks on various parameters such as packing damages, brand integrity, seal and instruction damages, changes in colors, sedimentation of injections, cracks, humidity, leaking, drying of oil, crushed/broken drugs, loss of drugs from blister cards, sticky drugs, unusual odors, and expiry dates. In-depth scrutiny of physical damage conditions encompassed considerations like overlay (27.32%), dusty drugs and packing (80.33%), signs of pest infestation (74.86%), signs of water damage (66.67%), presence of waste bins (69.40%), "No Smoking" signboard (42.62%), presence and condition of fire extinguishers (24.59% and 19.67% respectively), presence of sandbags near the drug store (13.11%), preventive measures for pest infestation (27.87%), and data quality assessment (29.51%). The average scores for checking storage quality conditions and physical drug damages were 46.06% and 48.20%, respectively, both falling below the 50th percentile.

These findings underscored significant deficiencies in the quality control measures implemented in drugstore sites, warranting immediate attention and improvement. A previous study [20] on pharmaceutical quality control and storage practices can provide valuable insights for enhancing these procedures. Implementing robust SOPs, investing in regular training programs, and adopting advanced technologies for monitoring drug quality can contribute to a more effective and reliable quality control framework within first-level health facilities.

## Conclusion

The study reveals that the overall supply chain maturity at first-level public health facilities is at a marginal capability level (36.35%). While some basic drug supply chain management procedures are in place, they are not consistently followed, and many systems remain manual. The findings underscore significant inconsistencies in the management functions of supplied drugs, with poor adherence to

Standard Operating Procedure (SOP) guidelines. This research highlighted critical deficiencies in various aspects of the drug supply chain at first-level public health facilities in Myanmar. Gaps in training, forecasting practices, storage management, ordering and receiving processes, dispensing patterns, transportation, waste management, LMIS, and quality control procedures were identified. The findings align with international studies, emphasizing the need for standardized procedures, enhanced training, and infrastructure improvements. Urgent interventions, benchmarking against global best practices, and collaborative efforts with international organizations are recommended to address these challenges and enhance the reliability and effectiveness of the pharmaceutical supply chain in Myanmar. Future research should explore tailored strategies for improvement in specific functional areas.

## Access to data

All collected data and synthesized information were displayed in the forms of words and tables in the finding portion and more information can be enquired from the corresponding author via email ([theinhlaing231@gmail.com](mailto:theinhlaing231@gmail.com)) and contact number (+95-9773603778).

## Dissemination Plan

The researchers intend to disseminate the outcomes of the research to the entirety of public health practitioners within the designated research domain, the regional public health department situated in the Bago region, and the procurement and supply division operating at the Central level. Ultimately, the research findings will be showcased at the Myanmar Research Congress and subsequently published in a reputable international journal.

## Administrative Information

**Funding:** The required funds for conducting this research were granted by MOHS Research Grant (2022-2023).

**Conflict of interest:** None declared.

**Ethical approval:** This research has already been approved by the IRB (Institutional Review Board), Ministry of Health, Naypyitaw, Myanmar.



## Author Contributions

### Principal Investigator

- Formulating the research framework, including planning and designing aspects
- Establishing a coherent research question and delineating objectives
- Contributing to the development of study methodology and statistical analysis
- Participating in the defense of the research proposal
- Overseeing the training of data collectors
- Advocating for the involvement of all pertinent resources in the research
- Supervising all procedures related to data collection
- Actively engaging in the qualitative data collection process
- Analyzing the gathered data and composing the final report
- Granting approval for the final report in collaboration with the Chief Investigator (CI) and submitting it

### Co-investigator

- Preparing materials for ethical clearance, proposal defense, and pre-testing
- Developing tools for data collection
- Conducting training sessions for data collectors
- Advocating for the engagement of relevant resource persons in the research
- Supervising all aspects of data collection procedures
- Participating in the qualitative data collection phase
- Managing the cleaning, organization, and entry of collected data
- Collaboratively approving the final report with the Principal Investigator (PI)

## Acknowledgements

Our hearts brim with gratitude towards the IR (Implementation Research) Granters from the esteemed Department of Medical Research, whose generous funding has been the lifeblood of this research endeavor. A heartfelt appreciation extends to the benevolent Deputy Director General and Deputy Directors of the Bago Regional Public Health Department, whose kind permission has paved the way

for our exploration. Special thanks dance towards the Deputy Director, Assistant Directors, and the compassionate public health professionals of Pyay District, whose invaluable in-kind support has been a beacon guiding our journey. Last but certainly not least, our sincere thanks to all the respondents, whose active participation has infused this research with vibrancy and significance.

## References

1. Department of Public Health. *Inventory Management*. Naypyitaw, Myanmar: Procurement and Supply Division, 2016.
2. Tolliver, Bartram. Burma National Supply Chain Baseline Results: Capability and Performance. Submitted to the US Agency for International Development by the Supply Chain Management System (SCMS) and the Three Millennium Development Goal Fund (3MDG) by the Partnership for Supply Chain Management (PFSCM), 2014.
3. J Moon, SJ Kang, JW Noh, Evaluation of primary health care system in Yangon Region, Myanmar: a mixed-method approach, *European Journal of Public Health*, Volume 32, Issue Supplement\_3, October 2022, ckac131.016, <https://doi.org/10.1093/eurpub/ckac131.016>
4. Green M D. Antimalarial drug resistance and the importance of drug quality monitoring. *J Postgrad Med* 2006; 52: pp. 288-90.
5. Godman B, Bucsics A, Bonanno P, et al. Barriers for access to new medicines: searching for the balance between rising costs and limited budgets. *Frontiers Public Heal*. 2018; 6: pp.328.
6. Linnér, L., Eriksson, I., Persson, M. *et al*. Forecasting drug utilization and expenditure: ten years of experience in Stockholm. *BMC Health Serv Res* **20**, 410 (2020). <https://doi.org/10.1186/s12913-020-05170-0>.
7. Deveshwar, A., & Dhawal, M.. *Inventory management delivering profits through stock management*. World Trade Centre, Dubai: Ram University of Science and Technology, 2013.
8. Jha SM. Management of Hospital Materials and Stores, *Hospital Management*: Himalaya Publishing House. 2001: pp. 229.
9. Mahatme M, Dakhale G, Hiware S, Shinde A, Salve A. Medical store management: an integrated economic analysis of a tertiary care hospital in central India. *J Young Pharm*. 2012 Apr;4(2):114-8. DOI: 10.4103/0975-1483.96626. PMID: 22754264; PMCID: PMC3385215.
10. John Snow, Inc./DELIVER in collaboration with the World Health Organization. Guidelines for the Storage of Essential Medicines and other Health Commodities 2003. Arlington, Va: John Snow, Inc./DELIVER, for the U.S. Agency for International Development
11. WHO/CHD, BASICS. *Handbook for Drug Supply Management at the First-level Health Facilities*. Available at:

- file:///C:/Users/DELL/Documents/Research%20Proposal%20for%20IR-grant%202020-2021/Research%20Proposal-2%20for%20IR-grant/Drug%20Supply%20Management%20at%20the%20First-level%20Health%20Facilities.pdf (Accessed: 18 July 2022)
12. USAID Global Health Supply Chain Program (2019). *Manual: Capability Maturity Module Questionnaire for All Levels*. Available at: <https://www.ghsupplychain.org/capability-maturity-module-questionnaire-all-levels> (Accessed: 19 July 2022)
  13. Department of Public Health (2020) *Inventory Management*. Naypyitaw, Myanmar: Procurement and Supply Division.
  14. Matowe, L., Waako, P., Adome, R.O. *et al.* A strategy to improve skills in pharmaceutical supply management in East Africa: the regional technical resource collaboration for pharmaceutical management. *Hum Resour Health* **6**, 30 (2008). <https://doi.org/10.1186/1478-4491-6-30>
  15. Chalker J: Effect of a drug supply and cost sharing system on prescribing and utilization: a controlled trial from Nepal. *Health Policy Plan.* 1995, 10 (4): 423-430. 10.1093/heapol/10.4.423.
  16. Grimshaw JM, Thomas RE, MacLennan GS, Fraser C, Ramsay CR, Vale LD, Whitty P, Eccles MP, Matowe L, Shirran E, Wensing M, Dijkstra R, Donaldson C: Effectiveness and efficiency of guideline dissemination and implementation strategies. *Health Technol Assess.* 2004, 8 (6):
  17. Obua C, Ogwal-Okeng JW, Waako P, Aupont O, Ross-Degnan D: Impact of an educational intervention to improve prescribing by private physicians in Uganda. *East Afr Med J.* 2004, S17-24. Suppl
  18. Weisz G, Nannestad B. The World Health Organization and the global standardization of medical training, a history. *Global Health.* 2021 Aug 28;17(1):96. doi: 10.1186/s12992-021-00733-0. PMID: 34454517; PMCID: PMC8397872.
  19. DeCorby-Watson, K., Mensah, G., Bergeron, K. *et al.* Effectiveness of capacity building interventions relevant to public health practice: a systematic review. *BMC Public Health* **18**, 684 (2018). <https://doi.org/10.1186/s12889-018-5591-6>
  20. George, S., & Elrashid, S. (2023). Inventory Management and Pharmaceutical Supply Chain Performance of Hospital Pharmacies in Bahrain: A Structural Equation Modeling Approach. *SAGE Open*, 13(1). <https://doi.org/10.1177/21582440221149717>
  21. Makridakis, Spyros, Michele Hibon, and Claus Moser. "Accuracy of Forecasting: An Empirical Investigation." *Journal of the Royal Statistical Society. Series A (General)* 142, no. 2 (1979): 97–145. <https://doi.org/10.2307/2345077>.
  22. Abernethy A, Adams L, Barrett M, Bechtel C, Brennan P, Butte A, Faulkner J, Fontaine E, Friedhoff S, Halamka J, Howell M, Johnson K, Long P, McGraw D, Miller R, Lee P, Perlin J, Rucker D, Sandy L, Savage L, Stump L, Tang P, Topol E, Tuckson R, Valdes K. The Promise

- of Digital Health: Then, Now, and the Future. *NAM Perspect.* 2022 Jun 27;2022:10.31478/202206e. doi: 10.31478/202206e. PMID: 36177208; PMCID: PMC9499383.
23. Bayked, Ewunetie & Kahissay, Mesfin & Workneh, Birhanu. (2019). Assessment of inventory and store management practices of pharmaceuticals in public health centers and hospitals of Dessie Town, Ethiopia. 10.21203/rs.2.14307/v1.
  24. Handel, Daniel & Hackman, Jeffrey. (2008). Implementing Electronic Health Records in the Emergency Department. *The Journal of Emergency Medicine.* 38. 257-63. 10.1016/j.jemermed.2008.01.020.
  25. Michael, I., Ogbonna, B., Sunday, N. *et al.* Assessment of disposal practices of expired and unused medications among community pharmacies in Anambra State southeast Nigeria: a mixed study design. *J of Pharm Policy and Pract* **12**, 12 (2019). <https://doi.org/10.1186/s40545-019-0174-1>
